# Supplementary material for: Chelate N,O-palladium(ii) complexes: synthesis, characterization and biological activity
Source: Royal Society of Chemistry journal article supplement (doi:10.1039/c5ra10204a), 2015-01-01
Supplement: c5ra10204a1.pdf [file c5ra10204a1.pdf]

**RSC Advances**

**Electronic Supplementary Information**

**Chelate *N,O*-palladium(II) complexes: synthesis, characterisation  
and biological activity**

*Vladimir P. Petrović,<sup>a</sup> Marko N. Živanović,<sup>b</sup> Dušica Simijonović,<sup>a</sup> Jelena Đorović,<sup>a,c</sup>  
Zorica D. Petrović<sup>\*a</sup> and Snežana D. Marković<sup>b</sup>*

<sup>a</sup>Faculty of Science, University of Kragujevac, Department of Chemistry, Radoja Domanovića 12, 34000 Kragujevac, Serbia

<sup>b</sup>Faculty of Science, University of Kragujevac, Department of Biology and Ecology, Radoja Domanovića 12, 34000 Kragujevac, Serbia

<sup>c</sup>Bioengineering Research and Development Center, 34000 Kragujevac, Republic of Serbia

Corresponding author's e-mail address: [zorica@kg.ac.rs](mailto:zorica@kg.ac.rs)

Corresponding author's postal address: Faculty of Science, University of Kragujevac, P.O. Box 60, 34000 Kragujevac, Serbia

Corresponding author's telephone and fax numbers: +381 34 336223, +381 34 335040

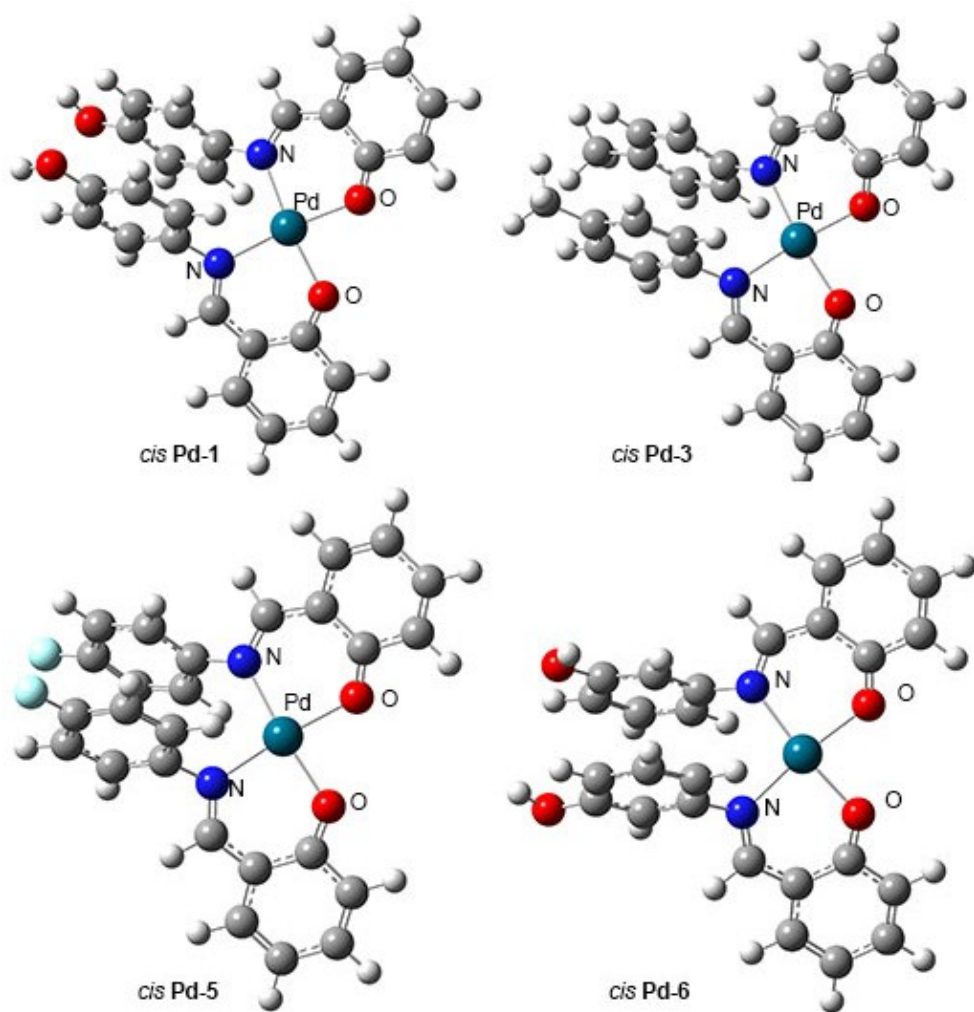

Figure S1. The optimised structures of *cis* palladium-Schiff base complexes **Pd-1**, **Pd-3**, **Pd-5**, and **Pd-6**

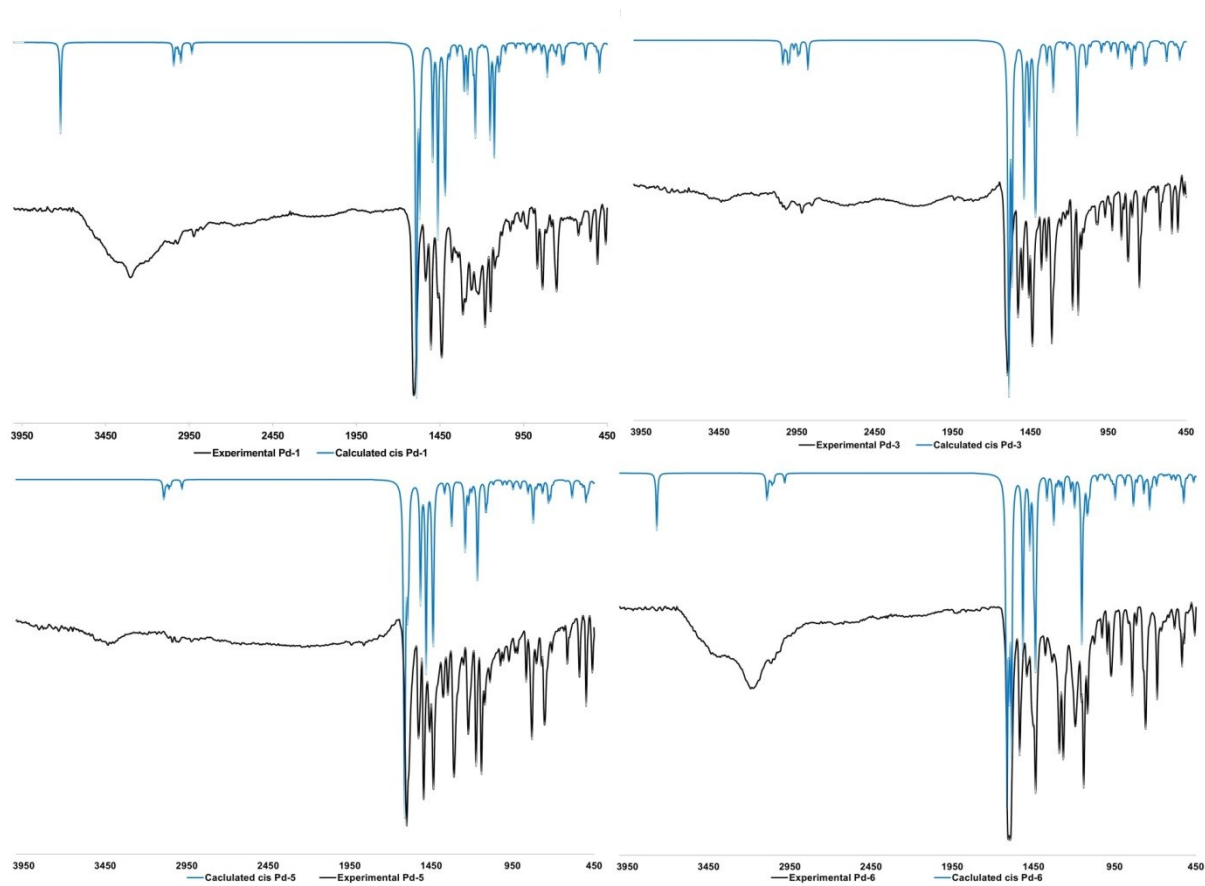

Figure S2. Calculated and experimental IR spectra of *cis* complexes **Pd-1**, **Pd-3**, **Pd-5**, and **Pd-6**

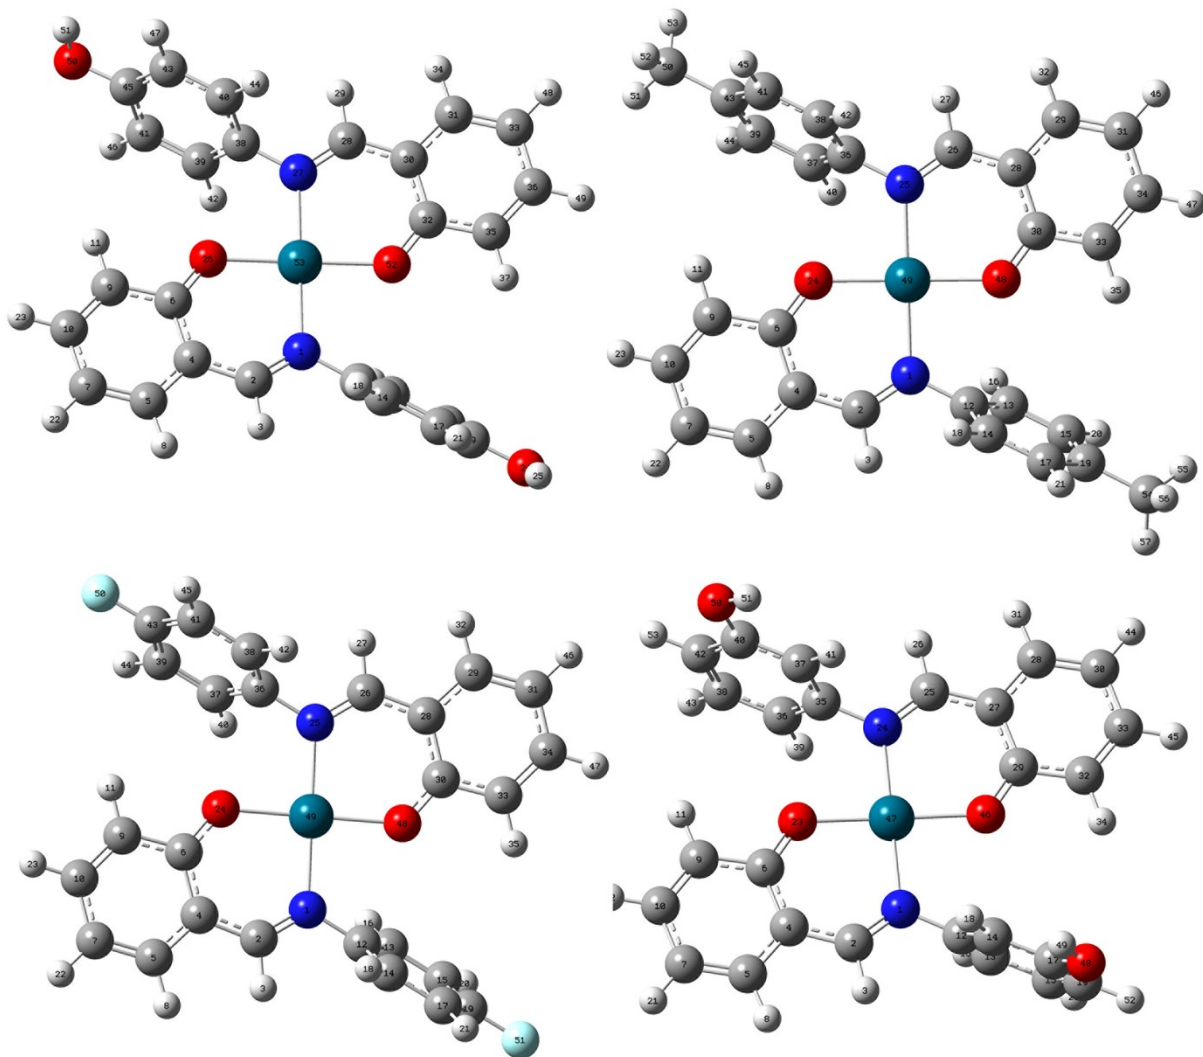

Figure S3. The optimised structures of *trans* palladium-Schiff base complexes **Pd-1**, **Pd-3**, **Pd-5**, and **Pd-6** with atoms labellings used in Tables S1-S4.

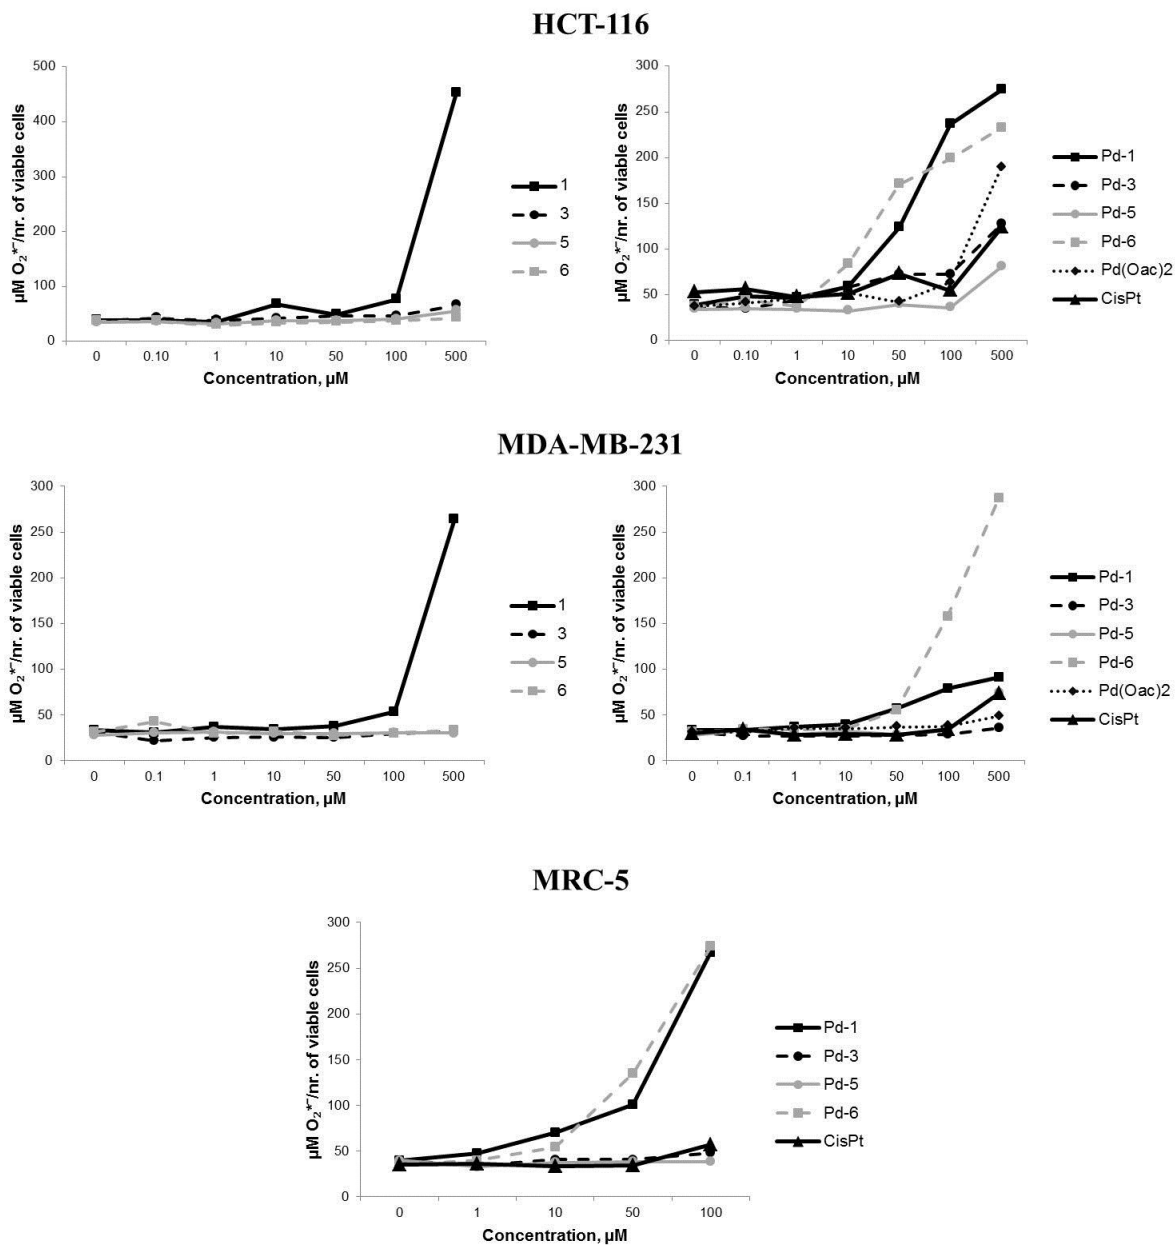

Figure S4. Effects of Schiff bases and their complexes on HCT-116, MDA-MB-231 and MRC-5 cell lines, expressed as the  $O_2^{\bullet-}$  concentration related to the number of viable cells, after 24 h of exposure

### HCT-116

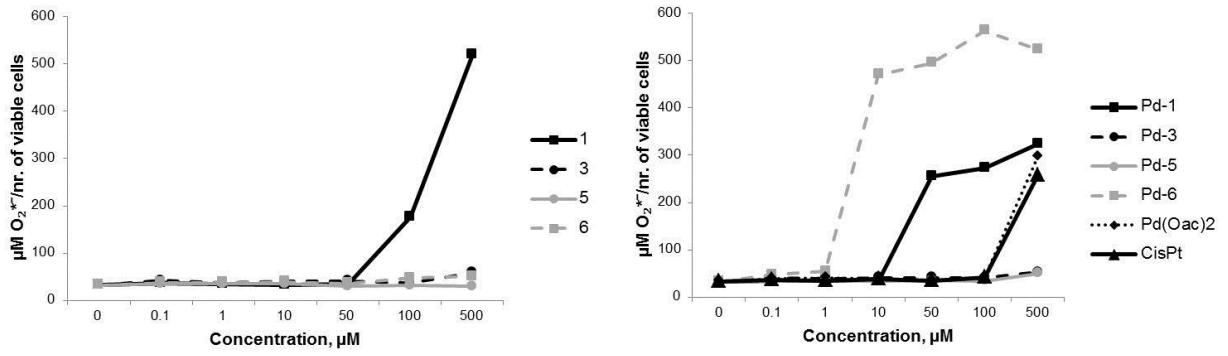

### MDA-MB-231

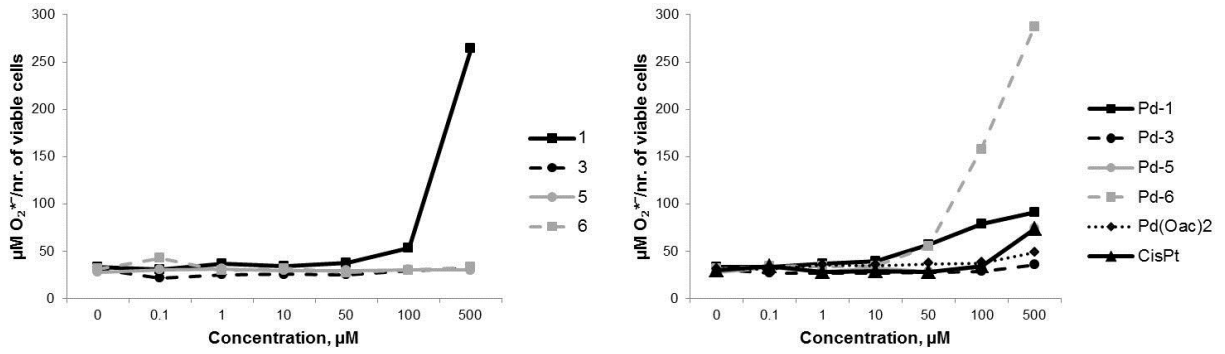

### MRC-5

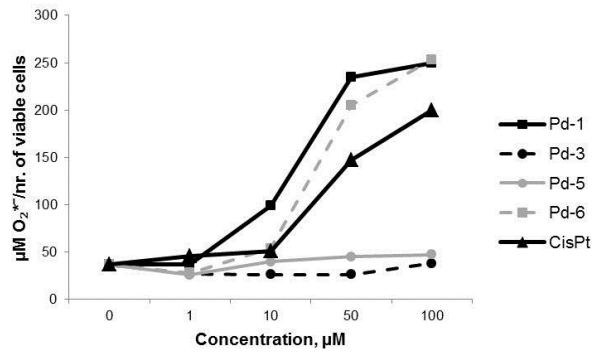

Figure S5. Effects of Schiff bases and their complexes on HCT-116, MDA-MB-231 and MRC-5 cell lines, expressed as the  $\text{O}_2^{\cdot-}$  concentration related to the number of viable cells, after 72 h of exposure

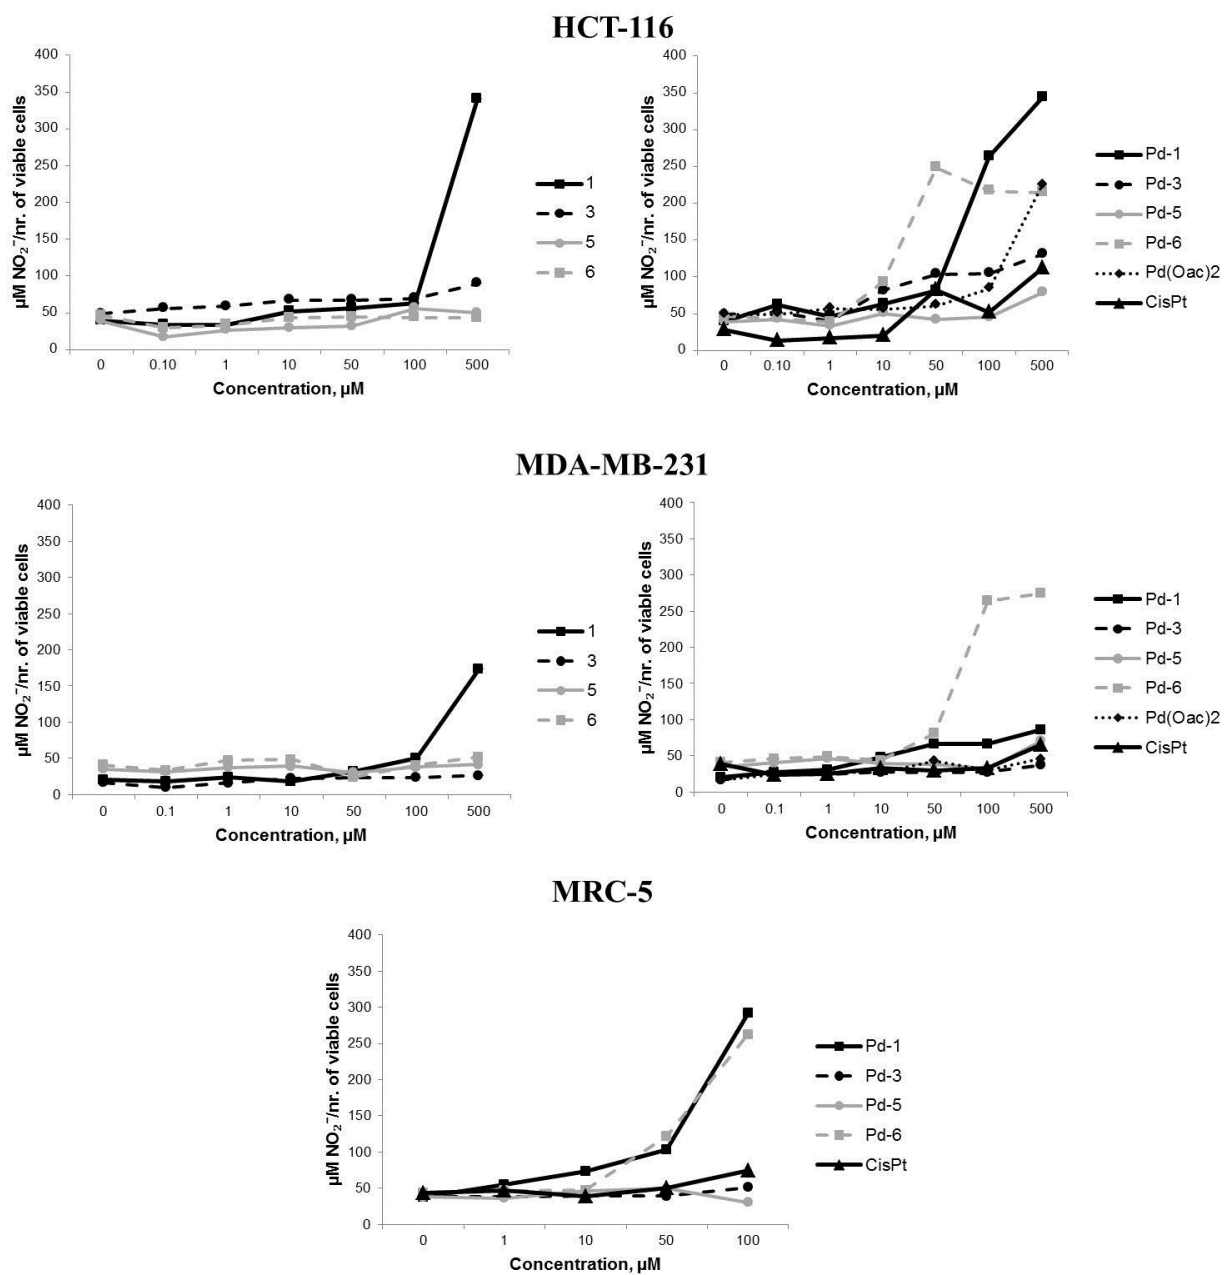

Figure S6. Effects of Schiff bases and their complexes on HCT-116, MDA-MB-231 and MRC-5 cell lines, expressed as the  $\text{NO}_2^-$  concentration related to the number of viable cells, after 24 h of exposure

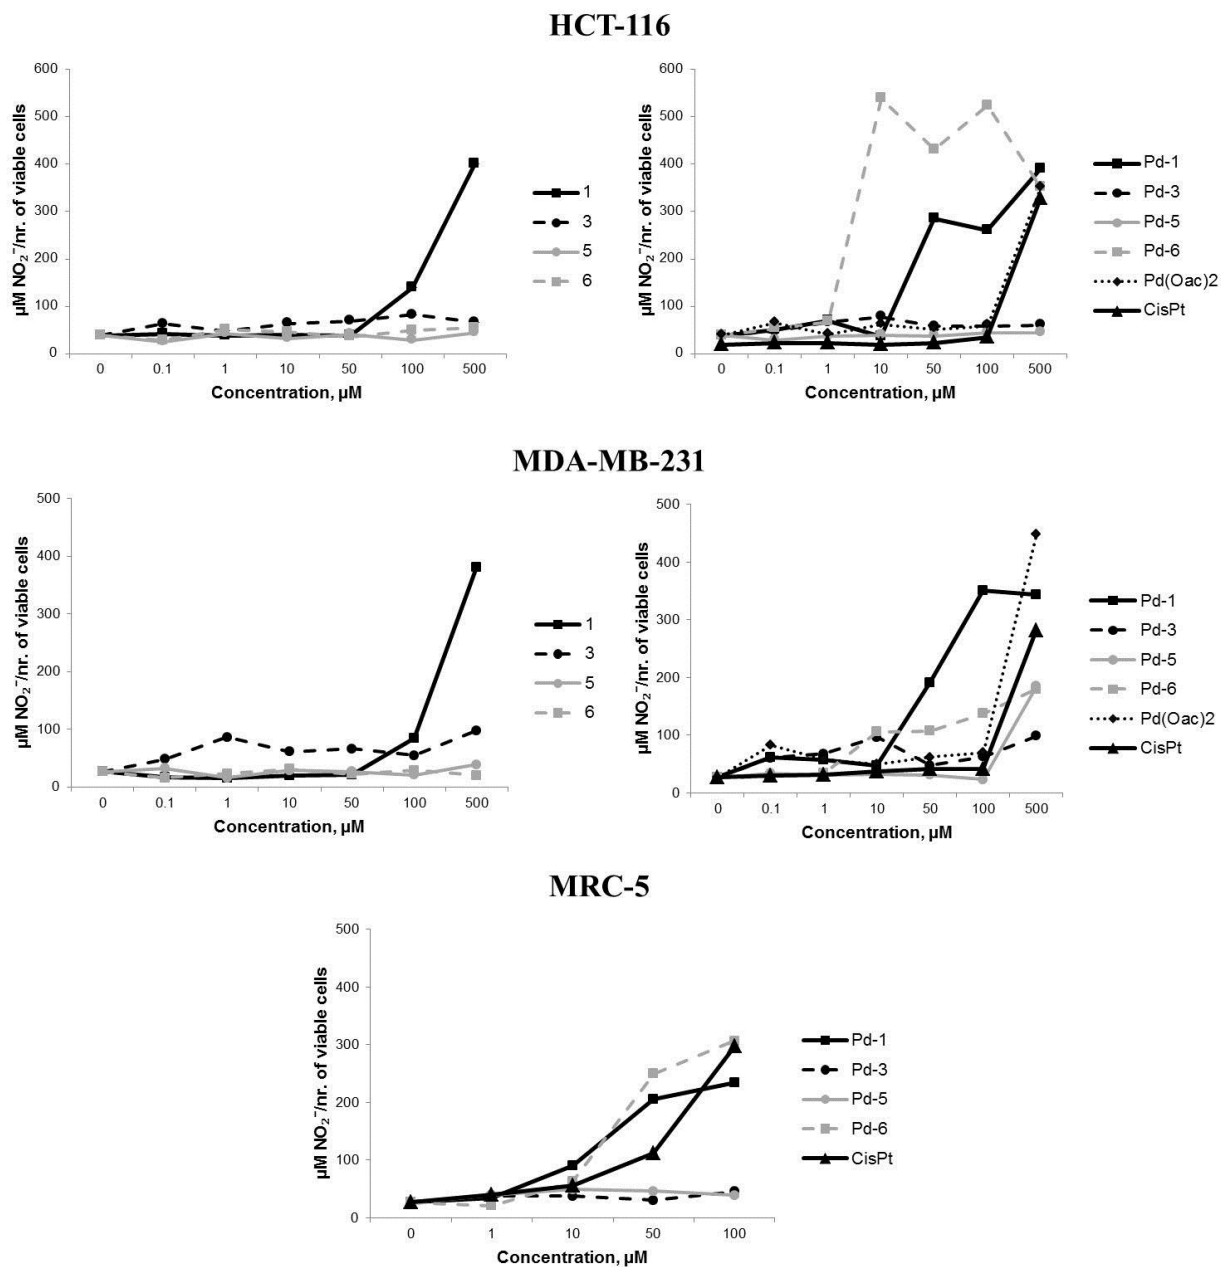

Figure S7. Effects of Schiff bases and their complexes on HCT-116, MDA-MB-231 and MRC-5 cell lines, expressed as the  $\text{NO}_2^-$  concentration related to the number of viable cells, after 72 h of exposure



### HCT-116

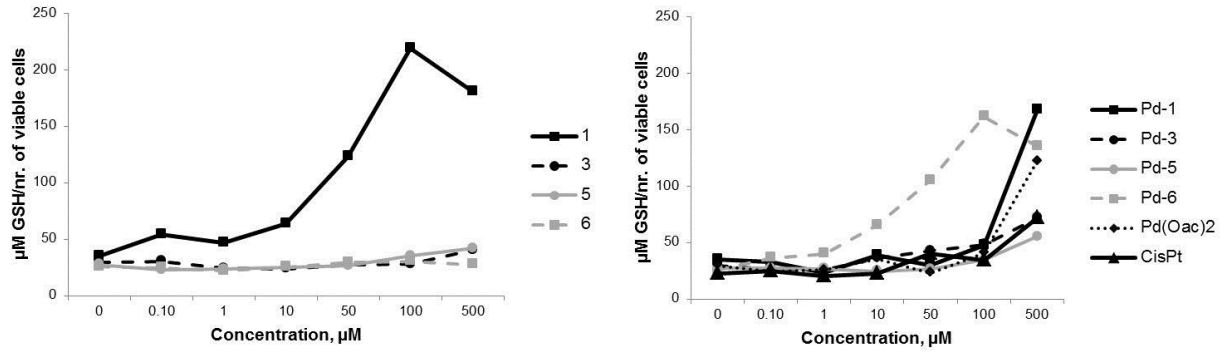

### MDA-MB-231

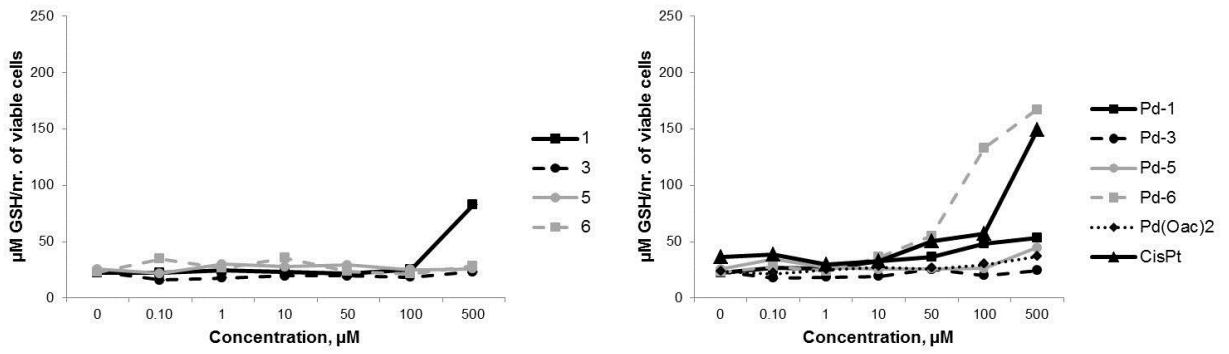

### MRC-5

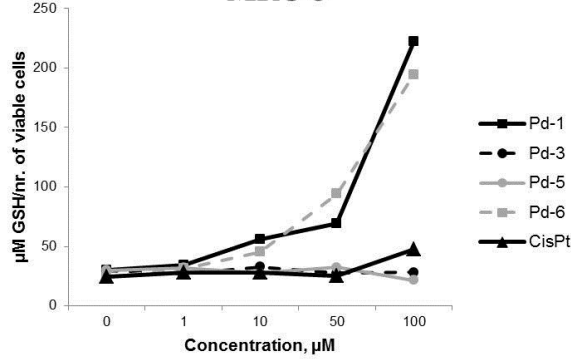

Figure S8. Effects of Schiff bases and their complexes on HCT-116, MDA-MB-231 and MRC-5 cell lines, expressed as the reduced glutathione (GSH) concentration related to the number of viable cells, after 24 h of exposure

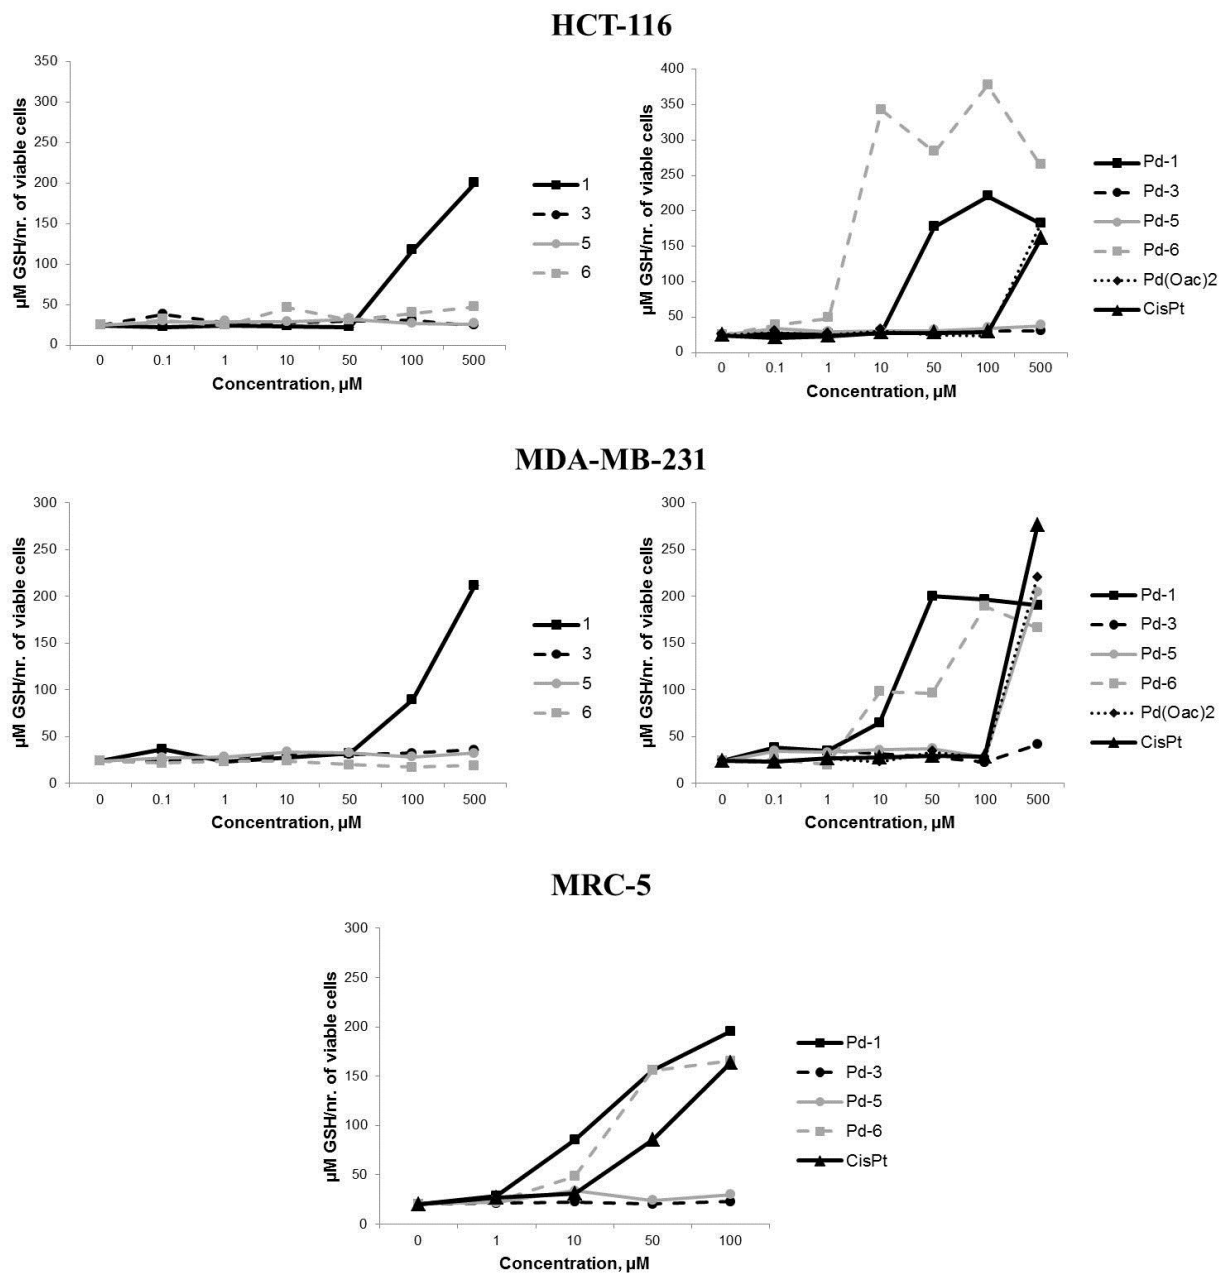

Figure S9. Effects of Schiff bases and their complexes on HCT-116, MDA-MB-231 and MRC-5 cell lines, expressed as the reduced glutathione (GSH) concentration related to the number of viable cells, after 72 h of exposure

Table S1.  $^{13}\text{C}$  NMR chemical shifts for the investigated Schiff bases and corresponding *cis* palladium complexes. R and AAE stand for correlation coefficient and Average Absolute Error.

| Compound                 | C=N      |        | Ar C-O |        | Ar C-N |        | Ar C   |        |        |        | CH <sub>3</sub> |       |       |
|--------------------------|----------|--------|--------|--------|--------|--------|--------|--------|--------|--------|-----------------|-------|-------|
|                          | Exp.     | Calc.  | Exp.   | Calc.  | Exp.   | Calc.  | Exp.   |        | Calc.  |        | Exp.            | Calc. |       |
| <b>Pd-1</b><br>R<br>0.99 | AAE<br>3 | 164.26 | 168.03 | 163.22 | 165.39 | 155.88 | 155.37 | 140.92 | 120.43 | 145.05 | 126.25          | /     | /     |
|                          |          |        |        |        |        |        |        | 135.22 | 119.74 | 138.72 | 121.33          |       |       |
|                          |          |        |        |        |        |        |        | 134.84 | 114.70 | 137.88 | 121.18          |       |       |
|                          |          |        |        |        |        |        |        | 125.70 | 114.36 | 127.98 | 112.79          |       |       |
| <b>Pd-3</b><br>R<br>0.99 | AAE<br>2 | 165.26 | 168.41 | 162.68 | 165.79 | 147.12 | 149.68 | 136.07 | 124.40 | 138.38 | 127.55          | 21.10 | 20.83 |
|                          |          |        |        |        |        |        |        | 135.00 | 120.70 | 136.81 | 125.90          |       |       |
|                          |          |        |        |        |        |        |        | 134.38 | 120.33 | 130.81 | 121.30          |       |       |
|                          |          |        |        |        |        |        |        | 128.63 | 115.03 | 129.59 | 112.53          |       |       |
| <b>Pd-5</b><br>R<br>0.97 | AAE<br>6 | 165.20 | 168.45 | 163.66 | 165.94 | 163.07 | 161.93 | 158.78 | 126.23 | 148.93 | 120.22          | /     | /     |
|                          |          |        |        |        |        |        |        | 145.40 | 126.07 | 138.28 | 114.61          |       |       |
|                          |          |        |        |        |        |        |        | 135.49 | 120.31 | 126.82 | 114.73          |       |       |
|                          |          |        |        |        |        |        |        | 134.51 | 114.89 | 121.10 | 112.79          |       |       |
| <b>Pd-6</b><br>R<br>0.99 | AAE<br>2 | 164.28 | 168.57 | 163.31 | 165.53 | 157.19 | 156.30 | 150.23 | 120.04 | 155.02 | 120.87          | /     | /     |
|                          |          |        |        |        |        |        |        | 135.35 | 115.45 | 139.00 | 116.64          |       |       |
|                          |          |        |        |        |        |        |        | 135.11 | 114.82 | 138.32 | 113.03          |       |       |
|                          |          |        |        |        |        |        |        | 128.78 | 113.37 | 131.67 | 111.72          |       |       |
|                          |          |        |        |        |        |        |        | 120.30 | 112.04 | 121.50 | 109.48          |       |       |

Table S2. Interatomic distances, angles, and dihedral angles in **Pd-1**

| Bond (Å)    |       | Angle (°)   |         | Dihedral angle (°) |          |
|-------------|-------|-------------|---------|--------------------|----------|
| N1-C2       | 1.294 | N1-C2-H3    | 116.141 | N1-C2-C4-C5        | 178.784  |
| C2-H3       | 1.096 | N1-C2-C4    | 128.924 | N1-C2-C4-C6        | 0.258    |
| C2-C4       | 1.424 | C2-C4-C5    | 116.808 | C2-C4-C5-C7        | -178.638 |
| C4-C5       | 1.414 | C2-C4-C6    | 123.806 | C2-C4-C5-H8        | 1.179    |
| C4-C6       | 1.427 | C2-C5-C7    | 122.094 | C2-C4-C6-C9        | 178.374  |
| C5-C7       | 1.369 | C4-C5-H8    | 117.981 | C4-C6-C9-C10       | 0.213    |
| C5-H8       | 1.088 | C4-C6-C9    | 117.237 | C4-C6-C9-H11       | 179.846  |
| C6-C9       | 1.419 | C6-C9-C10   | 121.551 | C2-N1-C12-C12      | 178.993  |
| C9-C10      | 1.370 | C6-C9-H11   | 116.641 | C2-N1-C12-C13      | 117.554  |
| C9-H11      | 1.086 | C2-N1-C12   | 118.093 | C2-N1-C12-C14      | -64.394  |
| N1-C12      | 1.422 | N1-C12-C13  | 119.933 | N1-C12-C13-C15     | 179.575  |
| C12-C13     | 1.392 | N1-C12-C14  | 120.481 | N1-C12-C13-H16     | 0.096    |
| C12-C14     | 1.387 | C12-C13-C15 | 120.431 | N1-C12-C14-C17     | -179.071 |
| C13-C15     | 1.380 | C12-C13-H16 | 118.962 | N1-C12-C14-H18     | -0.339   |
| C13-H16     | 1.085 | C12-C14-C17 | 120.287 | C12-C14-C17-C19    | 0.256    |
| C14-C17     | 1.388 | C12-C14-H18 | 119.472 | C12-C13-C15-H20    | 179.474  |
| C14-H18     | 1.086 | C14-C17-C19 | 119.864 | C12-C14-C17-H21    | 179.725  |
| C17-C19     | 1.388 | C13-C15-H20 | 121.308 | C4-C5-C7-H22       | 179.981  |
| C15-H20     | 1.085 | C14-C17-H21 | 120.084 | C6-C9-C10-H23      | 179.862  |
| C17-H21     | 1.088 | C5-C7-H22   | 120.866 | C14-C17-C19-O24    | 179.804  |
| C7-H22      | 1.084 | C9-C10-H23  | 119.193 | C17-C19-O24-H25    | -0.429   |
| C10-H23     | 1.087 | C17-C19-O24 | 122.713 | C2-C4-C6-O26       | -1.524   |
| C19-O24     | 1.358 | C19-O24-O25 | 109.820 |                    |          |
| O24-H25     | 0.961 | C4-C6-O26   | 125.530 |                    |          |
| C6-O26      | 1.286 | N1-Pd-N27   | 179.390 |                    |          |
| Pd-N (both) | 2.061 | O26-Pd-O52  | 177.482 |                    |          |
| PD-O (both) | 2.026 | N1-Pd-O52   | 88.581  |                    |          |
|             |       | N27-Pd-O52  | 91.406  |                    |          |
|             |       | N1-Pd-O26   | 91.406  |                    |          |
|             |       | N27-Pd-O26  | 88.581  |                    |          |

Table S3. Interatomic distances, angles, and dihedral angles in **Pd-3**

| Bond (Å)    |       | Angle (°)   |         | Dihedral angle (°) |            |
|-------------|-------|-------------|---------|--------------------|------------|
| N1-C2       | 1.294 | N1-C2-H3    | 116.171 | N1-C2-C4-C5        | 179.15729  |
| C2-H3       | 1.096 | N1-C2-C4    | 128.853 | N1-C2-C4-C6        | 0.5652605  |
| C2-C4       | 1.424 | C2-C4-C5    | 116.859 | C2-C4-C5-C7        | -178.79058 |
| C4-C5       | 1.414 | C2-C4-C6    | 123.767 | C2-C4-C5-H8        | 1.1141541  |
| C4-C6       | 1.427 | C2-C5-C7    | 122.092 | C2-C4-C6-C9        | 178.5333   |
| C5-C7       | 1.369 | C4-C5-H8    | 117.981 | C4-C6-C9-C10       | 0.1743852  |
| C5-H8       | 1.088 | C4-C6-C9    | 117.258 | C4-C6-C9-H11       | 179.68515  |
| C6-C9       | 1.420 | C6-C9-C10   | 121.538 | C4-C2-N1-C12       | 179.27036  |
| C9-C10      | 1.370 | C6-C9-H11   | 116.529 | C2-N1-C12-C13      | 117.31902  |
| C9-H11      | 1.086 | C2-N1-C12   | 118.085 | C2-N1-C12-C14      | -64.665833 |
| N1-C12      | 1.423 | N1-C12-C13  | 119.860 | N1-C12-C13-C15     | 179.46597  |
| C12-C13     | 1.390 | N1-C12-C14  | 120.366 | N1-C12-C13-H16     | 0.3931708  |
| C12-C14     | 1.387 | C12-C13-C15 | 119.832 | N1-C12-C14-C17     | -178.96398 |
| C13-C15     | 1.383 | C12-C13-H16 | 119.061 | N1-C12-C14-H18     | -0.540895  |
| C13-H16     | 1.086 | C12-C14-C17 | 119.908 | C12-C14-C17-C19    | 0.0085509  |
| C14-C17     | 1.388 | C12-C14-H18 | 119.392 | C12-C13-C15-H20    | 179.69999  |
| C14-H18     | 1.087 | C14-C17-C19 | 121.114 | C12-C14-C17-H21    | 179.49016  |
| C17-C19     | 1.391 | C13-C15-H20 | 119.452 | C4-C5-C7-H22       | -179.93577 |
| C15-H20     | 1.088 | C14-C17-H21 | 119.477 | C6-C9-C10-H23      | 179.77455  |
| C17-H21     | 1.088 | C5-C7-H22   | 120.855 | C2-C4-C6-O24       | -1.3216427 |
| C7-H22      | 1.084 | C9-C10-H23  | 119.223 | C14-C17-C19-C54    | -178.74571 |
| C10-H23     | 1.087 | C4-C6-O24   | 125.574 |                    |            |
| C6-O24      | 1.286 | C14-C17-C19 | 121.158 |                    |            |
| C54-H       | 1.094 | N1-Pd-N25   | 179.177 |                    |            |
| Pd-O (both) | 2.024 | O24-Pd-O48  | 177.599 |                    |            |
| Pd-N (both) | 2.060 | N1-Pd-O48   | 88.592  |                    |            |
|             |       | N25-Pd-O48  | 91.389  |                    |            |
|             |       | N1-Pd-O24   | 91.388  |                    |            |
|             |       | N25-Pd-O24  | 88.595  |                    |            |

Table S4. Interatomic distances, angles, and dihedral angles in **Pd-5**

| Bond (Å)    |       | Angle (°)   |         | Dihedral angle (°) |          |
|-------------|-------|-------------|---------|--------------------|----------|
| N1-C2       | 1.295 | N1-C2-H3    | 116.184 | N1-C2-C4-C5        | 178.942  |
| C2-H3       | 1.096 | N1-C2-C4    | 128.858 | N1-C2-C4-C6        | 0.288    |
| C2-C4       | 1.423 | C2-C4-C5    | 116.795 | C2-C4-C5-C7        | -178.799 |
| C4-C5       | 1.415 | C2-C4-C6    | 123.818 | C2-C4-C5-H8        | 1.060    |
| C4-C6       | 1.427 | C2-C5-C7    | 122.059 | C2-C4-C6-C9        | 178.608  |
| C5-C7       | 1.369 | C4-C5-H8    | 118.000 | C4-C6-C9-C10       | 0.117    |
| C5-H8       | 1.088 | C4-C6-C9    | 117.252 | C4-C6-C9-H11       | 179.662  |
| C6-C9       | 1.419 | C6-C9-C10   | 121.536 | C4-C2-N1-C12       | 179.166  |
| C9-C10      | 1.370 | C6-C9-H11   | 116.673 | C2-N1-C12-C13      | 117.131  |
| C9-H11      | 1.086 | C2-N1-C12   | 118.102 | C2-N1-C12-C14      | -64.699  |
| N1-C12      | 1.422 | N1-C12-C13  | 119.681 | N1-C12-C13-C15     | 179.579  |
| C12-C13     | 1.391 | N1-C12-C14  | 120.245 | N1-C12-C13-H16     | 0.207    |
| C12-C14     | 1.389 | C12-C13-C15 | 120.167 | N1-C12-C14-C17     | -179.179 |
| C13-C15     | 1.383 | C12-C13-H16 | 119.093 | N1-C12-C14-H18     | -0.399   |
| C13-H16     | 1.085 | C12-C14-C17 | 120.257 | C12-C14-C17-C19    | 0.269    |
| C14-C17     | 1.388 | C12-C14-H18 | 119.418 | C12-C13-C15-H20    | 179.493  |
| C14-H18     | 1.086 | C14-C17-C19 | 118.541 | C12-C14-C17-H21    | 179.795  |
| C17-C19     | 1.380 | C13-C15-H20 | 121.704 | C4-C5-C7-H22       | -179.982 |
| C15-H20     | 1.085 | C14-C17-H21 | 121.759 | C6-C9-C10-H23      | 179.825  |
| C17-H21     | 1.084 | C5-C7-H22   | 120.868 | C2-C4-C6-O24       | -1.235   |
| C7-H22      | 1.084 | C9-C10-H23  | 119.183 | C14-C17-C19-C54    | -2.485   |
| C10-H23     | 1.087 | C4-C6-O24   | 125.540 |                    |          |
| C6-O24      | 1.287 | N1-Pd-N25   | 179.299 |                    |          |
| C19-F       | 1.340 | O24-Pd-O48  | 177.739 |                    |          |
| Pd-O (both) | 2.025 | N1-Pd-O48   | 88.591  |                    |          |
| Pd-N (both) | 2.060 | N25-Pd-O48  | 91.396  |                    |          |
|             |       | N1-Pd-O24   | 91.396  |                    |          |
|             |       | N25-Pd-O24  | 88.590  |                    |          |

Table S5. Interatomic distances, angles, and dihedral angles in **Pd-6**

| Bond (Å)    |       | Angle (°)   |         | Dihedral angle (°) |          |
|-------------|-------|-------------|---------|--------------------|----------|
| N1-C2       | 1.293 | N1-C2-H3    | 116.241 | N1-C2-C4-C5        | 178.802  |
| C2-H3       | 1.096 | N1-C2-C4    | 128.583 | N1-C2-C4-C6        | -0.524   |
| C2-C4       | 1.424 | C2-C4-C5    | 116.920 | C2-C4-C5-C7        | -179.269 |
| C4-C5       | 1.414 | C2-C4-C6    | 123.713 | C2-C4-C5-H8        | 0.549    |
| C4-C6       | 1.427 | C2-C5-C7    | 122.036 | C2-C4-C6-C9        | 179.171  |
| C5-C7       | 1.369 | C4-C5-H8    | 117.999 | C4-C6-C9-C10       | 0.093    |
| C5-H8       | 1.088 | C4-C6-C9    | 117.288 | C4-C6-C9-H11       | -179.920 |
| C6-C9       | 1.420 | C6-C9-C10   | 121.481 | C4-C2-N1-C12       | 179.535  |
| C9-C10      | 1.370 | C6-C9-H11   | 116.468 | C2-N1-C12-C13      | 103.736  |
| C9-H11      | 1.086 | C2-N1-C12   | 118.423 | C2-N1-C12-C14      | -78.703  |
| N1-C12      | 1.424 | N1-C12-C13  | 119.912 | N1-C12-C13-C15     | 178.134  |
| C12-C13     | 1.386 | N1-C12-C14  | 119.118 | N1-C12-C13-H16     | -0.305   |
| C12-C14     | 1.388 | C12-C13-C15 | 118.891 | N1-C12-C14-C17     | -177.770 |
| C13-C15     | 1.387 | C12-C13-H16 | 119.418 | N1-C12-C14-H18     | 0.419    |
| C13-H16     | 1.085 | C12-C14-C17 | 119.495 | C12-C14-C17-C19    | -0.648   |
| C14-C17     | 1.389 | C12-C14-H18 | 119.520 | C12-C13-C15-H20    | 179.818  |
| C14-H18     | 1.088 | C14-C17-C19 | 121.044 | C12-C14-C17-H21    | 179.908  |
| C15-C19     | 1.386 | C13-C15-H20 | 119.584 | C6-C9-C10-H22      | -179.995 |
| C15-H20     | 1.086 | C5-C7-H21   | 120.871 | C2-C4-C6-O23       | -0.886   |
| C7-H21      | 1.084 | C9-C10-H22  | 119.194 | C4-C6-O23-Pd       | 0.219    |
| C10-H20     | 1.087 | C4-C6-O24   | 125.650 | C12-C14-C17-O48    | 179.874  |
| C6-O23      | 1.286 | C6-O23-Pd   | 127.156 | C14-C17-O48-H49    | -2.919   |
| C17-O48     | 1.357 | C14-C17-O48 | 122.307 |                    |          |
| O48-H49     | 0.961 | N1-Pd-N24   | 179.826 |                    |          |
| C19-H52     | 1.085 | O23-Pd-O46  | 178.593 |                    |          |
| Pd-N (both) | 2.055 | N1-Pd-O46   | 88.710  |                    |          |
| Pd-O (both) | 2.025 | N24-Pd-O46  | 91.287  |                    |          |
|             |       | N1-Pd-O23   | 91.287  |                    |          |
|             |       | N24-Pd-O23  | 88.711  |                    |          |

Table S6. Effects of Schiff bases and their complexes on HCT-116, MDA-MB-231 and MRC-5 cell lines, expressed as the O<sub>2</sub><sup>-</sup> concentration after 24 h of exposure. \*p < 0.05 as compared to the control cells

| Superoxide anion radical, O <sub>2</sub> <sup>-</sup> (μM) |             |             |             |             |             |             |             |             |                      |             |
|------------------------------------------------------------|-------------|-------------|-------------|-------------|-------------|-------------|-------------|-------------|----------------------|-------------|
| HCT-116                                                    |             |             |             |             |             |             |             |             |                      |             |
| Schiff bases                                               |             |             |             |             | Complexes   |             |             |             |                      |             |
| μM                                                         | 1           | 3           | 5           | 6           | Pd-1        | Pd-3        | Pd-5        | Pd-6        | Pd(OAc) <sub>2</sub> | CisPt       |
| 0                                                          | 37.07±0.28  | 37.07±0.28  | 37.07±0.28  | 37.07±0.28  | 37.07±0.28  | 37.07±0.28  | 37.07±0.28  | 37.07±0.28  | 37.07±0.28           | 40.03±0.33  |
| 0.1                                                        | 41.15±0.91* | 39.18±0.55  | 40.82±0.60* | 38.17±0.62  | 35.04±0.29  | 38.17±1.28  | 37.94±0.30  | 33.99±0.01* | 39.37±0.50*          | 46.16±2.58* |
| 1                                                          | 39.46±1.69  | 36.75±1.27  | 38.15±0.91  | 31.61±0.15* | 39.32±0.48* | 44.15±0.53* | 38.60±0.12* | 32.23±0.19* | 42.51±0.31*          | 50.57±0.53* |
| 10                                                         | 49.45±0.65* | 37.29±1.18  | 40.62±0.55* | 31.65±0.17* | 37.88±1.23  | 41.79±0.50* | 38.98±0.67* | 32.16±0.44* | 41.30±0.12*          | 45.87±1.15* |
| 50                                                         | 43.78±0.79* | 40.25±1.40  | 39.51±0.97* | 32.43±0.55* | 36.57±0.25  | 41.30±0.38* | 43.62±0.56* | 33.36±0.16* | 39.10±0.92           | 38.05±0.43  |
| 100                                                        | 40.09±0.35  | 36.58±1.52  | 36.03±0.77  | 31.79±0.11* | 39.19±0.72  | 41.05±0.95* | 35.89±0.35  | 36.71±0.50  | 41.67±0.92*          | 31.88±0.22* |
| 500                                                        | 64.04±1.06* | 41.37±0.78* | 41.25±0.28* | 33.01±0.55* | 42.36±0.62* | 54.85±0.47* | 51.47±0.19* | 46.96±0.52* | 40.96±0.90*          | 31.64±0.42* |
| MDA-MB-231                                                 |             |             |             |             |             |             |             |             |                      |             |
| Schiff bases                                               |             |             |             |             | Complexes   |             |             |             |                      |             |
| μM                                                         | 1           | 3           | 5           | 6           | Pd-1        | Pd-3        | Pd-5        | Pd-6        | Pd(OAc) <sub>2</sub> | CisPt       |
| 0                                                          | 31.02±0.19  | 31.02±0.19  | 31.02±0.19  | 31.02±0.19  | 31.02±0.19  | 31.02±0.19  | 31.02±0.19  | 31.02±0.19  | 31.02±0.19           | 30.56±0.36  |
| 0.1                                                        | 30.74±0.14  | 31.65±0.17  | 35.02±0.27* | 34.03±0.71* | 29.46±1.34  | 31.15±0.21  | 32.51±0.74  | 34.81±0.21* | 30.95±0.36           | 32.41±0.18* |
| 1                                                          | 30.97±0.08  | 32.67±0.23* | 33.51±0.40* | 28.39±0.32* | 32.02±0.49  | 31.97±0.20  | 29.79±0.17  | 32.82±0.31* | 30.53±0.38           | 31.61±0.19* |
| 10                                                         | 31.44±0.19  | 32.24±0.20* | 32.94±0.03* | 30.61±0.72  | 32.00±1.61  | 32.15±0.76  | 34.46±1.08* | 27.45±0.27* | 31.61±0.42           | 31.81±0.23* |
| 50                                                         | 34.70±0.11* | 31.73±0.24  | 30.96±0.08  | 27.06±0.59* | 35.70±0.41* | 31.73±0.20  | 31.21±0.35  | 30.00±0.85  | 32.77±0.87           | 30.45±0.10  |
| 100                                                        | 40.02±0.16* | 31.71±0.30  | 32.54±0.14* | 29.95±0.22  | 36.64±0.07* | 34.65±0.05* | 38.93±0.67* | 30.24±0.57  | 30.95±0.22           | 29.81±0.03* |
| 500                                                        | 61.67±1.17* | 32.24±0.17* | 31.06±0.11  | 28.82±0.07* | 37.43±1.37* | 36.01±0.13* | 47.63±0.56* | 48.46±0.47* | 31.16±0.73           | 30.24±0.23  |
| MRC-5                                                      |             |             |             |             |             |             |             |             |                      |             |
| μM                                                         |             |             |             |             | Pd-1        | Pd-3        | Pd-5        | Pd-6        | Pd(OAc) <sub>2</sub> | CisPt       |
| 0                                                          | -           | -           | -           | -           | 37.53±0.15  | 37.53±0.15  | 37.53±0.15  | 37.53±0.15  | -                    | 37.53±0.15  |
| 1                                                          | -           | -           | -           | -           | 37.05±1.10  | 35.51±2.20  | 35.39±3.43  | 39.20±2.98  | -                    | 40.97±0.72* |
| 10                                                         | -           | -           | -           | -           | 37.91±0.43  | 39.54±0.04  | 39.02±0.64  | 44.03±0.41* | -                    | 38.98±0.27  |
| 50                                                         | -           | -           | -           | -           | 38.93±0.22  | 40.95±0.31  | 39.73±0.56  | 42.21±0.63* | -                    | 40.23±0.15* |
| 100                                                        | -           | -           | -           | -           | 38.38±0.78  | 41.28±0.15  | 40.70±0.99  | 46.58±0.30* | -                    | 41.63±0.14* |



Table S7. Effects of Schiff bases and their complexes on HCT-116, MDA-MB-231 and MRC-5 cell lines, expressed as the O<sub>2</sub><sup>-</sup> concentration after 72 h of exposure. \*p < 0.05 as compared to the control cells

| Superoxide anion radical, O <sub>2</sub> <sup>-</sup> (μM) |             |             |             |             |             |             |             |             |                      |             |
|------------------------------------------------------------|-------------|-------------|-------------|-------------|-------------|-------------|-------------|-------------|----------------------|-------------|
| HCT-116                                                    |             |             |             |             |             |             |             |             |                      |             |
| Schiff bases                                               |             |             |             |             | Complexes   |             |             |             |                      |             |
| μM                                                         | 1           | 3           | 5           | 6           | Pd-1        | Pd-3        | Pd-5        | Pd-6        | Pd(OAc) <sub>2</sub> | CisPt       |
| 0                                                          | 31.78±0.09  | 31.78±0.09  | 31.78±0.09  | 31.78±0.09  | 31.78±0.09  | 31.78±0.09  | 31.78±0.09  | 31.78±0.09  | 31.78±0.09           | 31.78±0.09  |
| 0.1                                                        | 37.65±0.23* | 34.08±0.66* | 34.97±0.48  | 37.84±1.38* | 31.63±0.41  | 31.82±0.14  | 33.21±1.02  | 31.95±0.54  | 31.82±0.14           | 29.89±0.77  |
| 1                                                          | 36.29±0.88* | 32.73±0.57  | 35.20±0.45* | 35.28±1.85* | 31.02±0.15  | 33.58±1.17  | 33.18±0.23  | 34.38±0.15* | 33.58±1.17           | 29.37±0.18  |
| 10                                                         | 34.71±0.55* | 33.78±0.91  | 34.33±0.52* | 32.21±0.41  | 31.25±0.15  | 31.60±0.25  | 32.65±0.18  | 44.43±0.69* | 31.60±0.25           | 31.29±0.96  |
| 50                                                         | 35.70±0.46* | 34.98±0.59* | 29.47±0.50  | 31.24±1.06  | 33.18±0.14  | 31.11±0.17  | 33.15±0.81  | 45.16±0.83* | 31.11±0.17           | 32.27±1.01  |
| 100                                                        | 38.65±0.61* | 33.84±0.67  | 32.06±1.40  | 32.25±0.93  | 34.26±0.49* | 31.58±0.51  | 32.99±1.51  | 50.55±1.25* | 31.58±0.51           | 32.04±0.69  |
| 500                                                        | 67.01±1.23* | 41.35±0.63* | 29.57±2.62  | 32.98±0.53  | 41.40±0.26* | 33.54±0.21  | 40.69±1.77* | 50.44±0.52* | 33.54±0.21           | 29.19±0.37  |
| MDA-MB-231                                                 |             |             |             |             |             |             |             |             |                      |             |
| Schiff bases                                               |             |             |             |             | Complexes   |             |             |             |                      |             |
| μM                                                         | 1           | 3           | 5           | 6           | Pd-1        | Pd-3        | Pd-5        | Pd-6        | Pd(OAc) <sub>2</sub> | CisPt       |
| 0                                                          | 25.92±0.22  | 25.92±0.22  | 25.92±0.22  | 25.92±0.22  | 25.92±0.22  | 25.92±0.22  | 25.92±0.22  | 25.92±0.22  | 25.92±0.22           | 28.71±0.31  |
| 0.1                                                        | 27.64±0.15  | 26.00±0.18  | 29.89±0.76* | 30.45±0.28* | 20.05±0.22* | 23.60±0.18  | 26.73±0.04  | 25.59±0.08  | 25.17±0.29           | 29.08±0.08  |
| 1                                                          | 25.33±0.72  | 26.04±0.06  | 29.81±0.40* | 29.64±0.52* | 19.71±1.51* | 22.08±0.28* | 27.56±0.27  | 25.49±0.30  | 24.60±0.34           | 29.20±0.28  |
| 10                                                         | 25.56±0.05  | 25.08±0.13  | 28.19±0.66* | 27.04±0.24  | 21.64±0.07* | 23.72±0.15  | 26.07±0.07  | 25.07±0.03  | 25.40±0.12           | 29.01±0.07  |
| 50                                                         | 26.93±0.07  | 24.53±0.15  | 25.36±0.24  | 28.64±0.32* | 22.63±0.22* | 24.36±0.38  | 27.53±0.11  | 25.76±0.14  | 25.47±0.09           | 28.87±0.44  |
| 100                                                        | 36.19±0.13* | 24.49±0.04  | 26.93±0.28  | 25.77±0.16  | 22.32±0.10* | 25.12±0.19  | 28.91±0.27* | 26.29±0.11  | 24.61±0.35           | 28.14±0.19  |
| 500                                                        | 63.24±0.39* | 24.20±0.54  | 26.91±0.31  | 24.48±0.06  | 27.93±0.60  | 28.76±0.08* | 34.00±1.43* | 32.11±0.54* | 30.23±0.10*          | 27.16±0.11  |
| MRC-5                                                      |             |             |             |             |             |             |             |             |                      |             |
| μM                                                         |             |             |             |             | Pd-1        | Pd-3        | Pd-5        | Pd-6        | Pd(OAc) <sub>2</sub> | CisPt       |
| 0                                                          | -           | -           | -           | -           | 37.11±0.26  | 37.11±0.26  | 37.11±0.26  | 37.11±0.26  | -                    | 37.11±0.26  |
| 1                                                          | -           | -           | -           | -           | 38.85±0.19  | 34.72±0.09* | 32.51±0.60* | 30.85±0.78* | -                    | 37.99±1.26  |
| 10                                                         | -           | -           | -           | -           | 36.93±0.41  | 36.00±0.66  | 36.21±0.99  | 33.92±0.67* | -                    | 35.78±0.68  |
| 50                                                         | -           | -           | -           | -           | 36.23±0.30  | 35.88±0.17  | 43.00±0.99* | 30.93±0.40* | -                    | 37.84±1.63  |
| 100                                                        | -           | -           | -           | -           | 37.66±0.13  | 36.52±0.44  | 44.48±2.01* | 35.30±0.29  | -                    | 32.82±1.17* |

Table S8. Effects of Schiff bases and their complexes on HCT-116, MDA-MB-231 and MRC-5 cell lines, expressed as the NO<sub>2</sub><sup>-</sup> concentration after 24 h of exposure. \*p < 0.05 as compared to the control cells

| Nitrites, NO <sub>2</sub> <sup>-</sup> (μM) |             |             |             |             |             |             |             |             |                      |             |
|---------------------------------------------|-------------|-------------|-------------|-------------|-------------|-------------|-------------|-------------|----------------------|-------------|
| HCT-116                                     |             |             |             |             |             |             |             |             |                      |             |
| Schiff bases                                |             |             |             |             | Complexes   |             |             |             |                      |             |
| μM                                          | 1           | 3           | 5           | 6           | Pd-1        | Pd-3        | Pd-5        | Pd-6        | Pd(OAc) <sub>2</sub> | CisPt       |
| 0                                           | 43.21±0.34  | 43.21±0.34  | 43.21±0.34  | 43.21±0.34  | 43.21±0.34  | 43.21±0.34  | 43.21±0.34  | 43.21±0.34  | 43.21±0.34           | 28.37±0.27  |
| 0.1                                         | 41.65±0.63  | 46.39±0.81  | 19.77±1.02* | 28.18±2.23* | 51.92±1.17* | 51.76±0.83* | 47.24±2.34* | 31.20±1.26* | 42.40±1.45           | 10.96±0.43* |
| 1                                           | 41.96±1.42  | 50.83±0.22* | 31.92±2.20* | 33.92±4.00* | 45.46±2.08  | 35.96±0.64* | 39.14±5.08  | 31.18±0.81* | 47.40±0.24*          | 18.11±1.37* |
| 10                                          | 43.62±3.41  | 54.13±0.99* | 32.46±3.44* | 37.64±2.21* | 47.17±1.15* | 52.40±1.89* | 62.07±1.55* | 33.25±2.13* | 39.31±0.25*          | 18.00±0.98* |
| 50                                          | 57.30±1.42* | 52.43±2.19* | 34.13±1.64* | 38.04±0.73* | 27.90±0.46* | 53.31±1.96* | 47.86±1.59* | 45.42±2.56  | 50.96±0.17*          | 43.36±1.86* |
| 100                                         | 38.91±2.45  | 49.54±2.05* | 51.54±0.42* | 34.60±0.38* | 50.86±0.60* | 53.93±0.83* | 46.64±3.25  | 37.38±3.04* | 49.46±1.74*          | 29.72±0.52  |
| 500                                         | 55.95±3.18* | 51.01±0.24* | 38.10±4.15* | 31.40±2.18* | 61.74±0.51* | 50.89±0.79* | 51.95±1.01* | 40.51±1.27  | 43.92±1.69           | 31.26±1.47  |
| MDA-MB-231                                  |             |             |             |             |             |             |             |             |                      |             |
| Schiff bases                                |             |             |             |             | Complexes   |             |             |             |                      |             |
| μM                                          | 1           | 3           | 5           | 6           | Pd-1        | Pd-3        | Pd-5        | Pd-6        | Pd(OAc) <sub>2</sub> | CisPt       |
| 0                                           | 28.21±0.22  | 28.21±0.22  | 28.21±0.22  | 28.21±0.22  | 28.21±0.22  | 28.21±0.22  | 28.21±0.22  | 28.21±0.22  | 28.21±0.22           | 39.00±0.30  |
| 0.1                                         | 27.08±0.49  | 24.43±0.41  | 26.21±0.94  | 18.51±1.81* | 35.79±2.31* | 57.98±2.98* | 28.74±1.09  | 32.48±1.30* | 42.51±1.15*          | 22.59±1.78* |
| 1                                           | 29.86±0.31  | 35.59±1.78* | 29.10±1.17  | 31.83±1.38* | 38.89±0.57* | 49.56±1.85* | 35.20±3.68* | 33.22±1.53* | 41.90±1.05*          | 28.10±1.32* |
| 10                                          | 24.31±0.57  | 47.55±3.22* | 31.08±1.30  | 32.49±1.75* | 57.43±0.49* | 56.90±0.78* | 30.72±1.98  | 24.22±0.98* | 42.09±0.32*          | 36.17±1.18* |
| 50                                          | 43.59±2.10* | 50.72±3.48* | 22.87±0.89* | 16.65±1.90* | 61.86±5.69* | 52.17±3.67* | 30.87±3.22* | 31.20±2.47* | 65.91±2.88*          | 31.55±0.88* |
| 100                                         | 56.11±1.07* | 42.50±3.91* | 29.57±0.26  | 28.06±0.95  | 45.37±0.09* | 56.72±3.08* | 27.63±1.09  | 35.56±2.96* | 43.10±0.33*          | 28.88±1.77* |
| 500                                         | 60.24±1.02* | 45.67±1.40* | 30.89±1.31  | 31.72±0.97* | 52.31±1.73* | 64.79±1.16* | 32.99±0.51* | 32.63±1.17* | 50.95±1.46*          | 26.87±0.47* |
| MRC-5                                       |             |             |             |             |             |             |             |             |                      |             |
| μM                                          |             |             |             |             | Pd-1        | Pd-3        | Pd-5        | Pd-6        | Pd(OAc) <sub>2</sub> | CisPt       |
| 0                                           | -           | -           | -           | -           | 40.27±0.27  | 40.27±0.24  | 40.27±0.27  | 40.27±0.27  | -                    | 40.27±0.27  |
| 1                                           | -           | -           | -           | -           | 48.57±2.13* | 46.28±1.65* | 44.50±1.98* | 40.03±1.43  | -                    | 45.68±1.42* |
| 10                                          | -           | -           | -           | -           | 44.82±0.72* | 44.15±1.22* | 54.72±2.20* | 33.75±1.49* | -                    | 39.36±1.06  |
| 50                                          | -           | -           | -           | -           | 45.23±2.62* | 45.19±0.48* | 58.43±1.23* | 33.44±1.42* | -                    | 50.88±0.06* |
| 100                                         | -           | -           | -           | -           | 47.90±0.62* | 49.92±3.45* | 36.22±1.16* | 39.14±1.83  | -                    | 47.17±2.30* |

Table S9. Effects of Schiff bases and their complexes on HCT-116, MDA-MB-231 and MRC-5 cell lines, expressed as the NO<sub>2</sub><sup>-</sup> concentration after 72 h of exposure. \*p < 0.05 as compared to the control cells

| Nitrites, NO <sub>2</sub> <sup>-</sup> (μM) |             |             |             |             |             |             |             |             |                      |             |
|---------------------------------------------|-------------|-------------|-------------|-------------|-------------|-------------|-------------|-------------|----------------------|-------------|
| HCT-116                                     |             |             |             |             |             |             |             |             |                      |             |
| Schiff bases                                |             |             |             |             | Complexes   |             |             |             |                      |             |
| μM                                          | 1           | 3           | 5           | 6           | Pd-1        | Pd-3        | Pd-5        | Pd-6        | Pd(OAc) <sub>2</sub> | CisPt       |
| 0                                           | 37.88±0.32  | 37.88±0.32  | 37.88±0.32  | 37.88±0.32  | 37.88±0.32  | 37.88±0.32  | 37.88±0.32  | 37.88±0.32  | 37.88±0.32           | 18.69±0.19  |
| 0.1                                         | 43.54±2.03* | 51.42±1.42* | 25.75±3.43* | 28.00±1.29* | 47.52±1.51* | 37.42±1.92  | 28.57±0.22* | 36.29±2.20  | 53.72±1.16*          | 18.63±1.21  |
| 1                                           | 41.50±4.74* | 42.10±0.90* | 42.74±2.29* | 47.98±1.31* | 63.50±1.46* | 56.38±0.28* | 35.67±1.41  | 42.88±0.61* | 33.84±3.37*          | 18.21±0.13  |
| 10                                          | 43.85±0.39* | 54.29±2.74* | 31.62±0.55* | 37.08±0.51  | 32.90±0.94* | 59.95±0.35* | 39.16±1.53  | 50.91±2.08* | 50.80±1.29*          | 15.18±0.72* |
| 50                                          | 39.43±1.07  | 59.00±1.31* | 40.98±2.62  | 31.46±2.87* | 37.14±2.13  | 43.91±2.06* | 35.48±0.84  | 39.36±1.92  | 47.53±1.71*          | 20.82±0.42  |
| 100                                         | 30.71±1.51* | 74.06±1.12* | 29.58±3.60* | 33.38±1.22* | 32.76±0.89* | 46.19±2.13* | 43.09±1.73* | 47.02±2.07* | 44.81±0.59*          | 26.69±2.85* |
| 500                                         | 51.64±3.00* | 47.43±3.88* | 44.19±3.02* | 34.90±1.00* | 49.76±1.75* | 38.75±1.60  | 36.33±0.83  | 33.82±1.37* | 39.79±2.24           | 37.12±1.11* |
| MDA-MB-231                                  |             |             |             |             |             |             |             |             |                      |             |
| Schiff bases                                |             |             |             |             | Complexes   |             |             |             |                      |             |
| μM                                          | 1           | 3           | 5           | 6           | Pd-1        | Pd-3        | Pd-5        | Pd-6        | Pd(OAc) <sub>2</sub> | CisPt       |
| 0                                           | 26.51±0.24  | 26.51±0.24  | 26.51±0.24  | 26.51±0.24  | 26.51±0.24  | 26.51±0.24  | 26.51±0.24  | 26.51±0.24  | 26.51±0.24           | 26.51±0.24  |
| 0.1                                         | 17.44±0.44* | 48.32±2.61* | 31.05±0.95* | 16.61±0.98* | 50.43±0.96* | 55.52±1.36* | 30.46±2.59  | 28.21±1.51  | 63.90±5.25*          | 29.62±0.26  |
| 1                                           | 16.19±0.54* | 75.03±2.29* | 14.60±1.00* | 20.64±3.50* | 49.57±3.55* | 56.22±2.37* | 25.04±0.75  | 33.91±1.56* | 53.71±1.04*          | 28.97±0.53  |
| 10                                          | 20.18±0.49* | 53.53±1.29* | 25.90±0.72  | 30.95±1.40* | 25.46±0.94  | 78.20±4.11* | 28.23±1.41  | 22.41±0.71* | 50.33±0.56*          | 37.18±0.78* |
| 50                                          | 16.94±0.19* | 56.11±1.93* | 23.71±0.70* | 24.85±0.46  | 30.12±0.17* | 42.94±2.13* | 27.17±0.97  | 20.93±1.27* | 59.13±2.55*          | 38.89±0.89* |
| 100                                         | 24.28±0.87  | 46.30±2.57* | 19.75±1.40* | 31.17±0.62* | 61.31±0.95* | 62.02±0.05* | 22.64±1.84* | 19.10±0.26* | 68.01±0.86*          | 39.79±0.77* |
| 500                                         | 49.56±0.79* | 62.75±2.58* | 29.76±1.43* | 22.93±0.56* | 51.22±0.60* | 72.93±4.24* | 23.00±1.18  | 24.13±1.60  | 50.80±1.84*          | 31.87±1.00* |
| MRC-5                                       |             |             |             |             |             |             |             |             |                      |             |
| μM                                          |             |             |             |             | Pd-1        | Pd-3        | Pd-5        | Pd-6        | Pd(OAc) <sub>2</sub> | CisPt       |
| 0                                           | -           | -           | -           | -           | 26.40±0.28  | 26.40±0.28  | 26.40±0.28  | 26.40±0.28  | -                    | 26.40±0.28  |
| 1                                           | -           | -           | -           | -           | 35.99±2.19* | 49.51±1.18* | 49.40±2.49* | 22.59±0.75  | -                    | 33.68±3.14* |
| 10                                          | -           | -           | -           | -           | 33.84±1.62* | 51.09±2.10* | 44.14±1.48* | 39.57±0.38* | -                    | 39.16±2.01* |
| 50                                          | -           | -           | -           | -           | 31.65±2.73* | 40.79±1.19* | 43.69±1.70* | 37.57±1.70* | -                    | 28.73±0.93  |
| 100                                         | -           | -           | -           | -           | 35.34±0.49* | 43.26±1.37* | 36.80±1.72* | 42.69±1.30* | -                    | 48.75±1.18* |

Table S10. Effects of Schiff bases and their complexes on HCT-116, MDA-MB-231 and MRC-5 cell lines, expressed as the reduced glutathione (GSH) concentration after 24 h of exposure. \*p < 0.05 as compared to the control cells

| GSH (μM)     |             |             |             |             |             |             |             |             |                      |             |
|--------------|-------------|-------------|-------------|-------------|-------------|-------------|-------------|-------------|----------------------|-------------|
| HCT-116      |             |             |             |             |             |             |             |             |                      |             |
| Schiff bases |             |             |             |             | Complexes   |             |             |             |                      |             |
| μM           | 1           | 3           | 5           | 6           | Pd-1        | Pd-3        | Pd-5        | Pd-6        | Pd(OAc) <sub>2</sub> | CisPt       |
| 0            | 29.56±0.25  | 29.56±0.25  | 29.56±0.25  | 29.56±0.25  | 29.56±0.25  | 29.56±0.25  | 29.56±0.25  | 29.56±0.25  | 29.56±0.25           | 22.85±0.25  |
| 0.1          | 35.35±1.36* | 28.05±0.58  | 26.30±1.66  | 28.93±0.69  | 31.45±1.40  | 29.19±0.26  | 29.56±0.59  | 31.78±0.59  | 23.77±0.22*          | 20.6±0.20*  |
| 1            | 35.16±0.87* | 23.24±0.11* | 27.87±0.82  | 27.02±1.40  | 23.03±0.83* | 25.77±1.16* | 30.33±0.70  | 39.45±0.86* | 23.95±0.05*          | 22.23±0.54  |
| 10           | 36.46±0.96* | 21.29±0.49* | 27.50±2.19  | 27.23±0.14  | 25.43±1.70* | 26.02±0.42* | 29.41±0.93  | 28.70±3.22  | 27.92±1.11           | 20.28±0.98* |
| 50           | 32.76±0.40  | 23.81±0.73* | 27.84±0.80  | 30.98±2.93  | 23.98±0.68* | 24.49±0.41* | 29.22±0.34  | 23.40±0.88* | 21.49±0.24*          | 21.21±0.08  |
| 100          | 32.55±1.52  | 22.24±0.39* | 31.38±0.60  | 29.65±0.25  | 22.71±0.31* | 27.52±0.33  | 34.61±0.58* | 33.91±1.94  | 26.89±0.85*          | 20.21±0.08* |
| 500          | 25.09±1.27* | 25.59±0.52* | 31.37±1.03  | 24.47±0.85* | 21.29±0.29* | 31.07±1.24  | 35.30±0.59* | 31.09±1.80  | 26.50±0.36*          | 20.22±1.77  |
| MDA-MB-231   |             |             |             |             |             |             |             |             |                      |             |
| Schiff bases |             |             |             |             | Complexes   |             |             |             |                      |             |
| μM           | 1           | 3           | 5           | 6           | Pd-1        | Pd-3        | Pd-5        | Pd-6        | Pd(OAc) <sub>2</sub> | CisPt       |
| 0            | 23.68±0.24  | 23.68±0.24  | 23.68±0.24  | 23.68±0.24  | 23.68±0.24  | 23.68±0.24  | 23.68±0.24  | 23.68±0.24  | 23.68±0.24           | 36.24±0.24  |
| 0.1          | 24.23±1.18  | 23.43±0.54  | 20.90±0.15* | 28.88±1.30* | 26.03±1.42  | 20.61±0.02  | 28.66±1.21* | 29.64±0.32* | 21.64±1.63           | 36.27±1.18  |
| 1            | 22.90±1.15  | 23.50±0.21  | 26.81±0.98* | 26.67±1.30  | 24.50±0.81  | 22.70±0.21  | 23.58±1.78  | 24.34±0.87  | 21.82±0.43           | 33.79±0.51  |
| 10           | 23.32±0.30  | 24.49±1.11  | 25.54±0.40  | 35.80±2.19* | 29.20±0.36* | 23.62±0.29  | 23.09±0.34  | 30.23±1.11* | 25.00±0.05           | 35.66±0.43  |
| 50           | 21.84±0.14  | 24.78±0.48  | 25.31±0.27  | 24.25±0.74  | 25.24±0.75  | 29.22±1.05* | 24.02±0.45  | 31.54±0.22* | 23.39±0.27           | 53.53±1.31* |
| 100          | 21.43±0.28  | 19.99±0.08* | 22.59±0.90  | 22.33±0.21  | 24.74±0.67  | 24.44±0.66  | 25.94±0.63  | 26.80±1.00* | 24.63±0.62           | 48.74±1.96* |
| 500          | 21.64±0.12  | 23.67±0.16  | 22.07±0.16  | 25.77±0.69  | 24.33±0.62  | 25.09±1.23  | 24.08±0.59  | 29.66±1.24* | 23.98±1.32           | 60.8±4.12*  |
| MRC-5        |             |             |             |             |             |             |             |             |                      |             |
| μM           |             |             |             |             | Pd-1        | Pd-3        | Pd-5        | Pd-6        | Pd(OAc) <sub>2</sub> | CisPt       |
| 0            | -           | -           | -           | -           | 27.27±0.11  | 27.27±0.11  | 27.27±0.11  | 27.27±0.11  | -                    | 27.27±0.11  |
| 1            | -           | -           | -           | -           | 26.12±0.45  | 27.85±0.71  | 33.58±0.86* | 31.95±0.46* | -                    | 32.17±1.20  |
| 10           | -           | -           | -           | -           | 29.41±0.57* | 31.03±1.12* | 27.39±1.69  | 37.86±1.20* | -                    | 32.98±1.22* |
| 50           | -           | -           | -           | -           | 25.99±0.27  | 26.91±1.15  | 32.41±1.76* | 30.39±0.92* | -                    | 29.69±2.25  |
| 100          | -           | -           | -           | -           | 31.16±0.98* | 23.32±0.54* | 22.11±0.09* | 34.11±0.23* | -                    | 35.59±1.16* |

Table S11. Effects of Schiff bases and their complexes on HCT-116, MDA-MB-231 and MRC-5 cell lines, expressed as the reduced glutathione (GSH) concentration after 72 h of exposure. \*p < 0.05 as compared to the control cells

| GSH ( $\mu\text{M}$ ) |             |             |             |             |             |             |             |             |                      |             |
|-----------------------|-------------|-------------|-------------|-------------|-------------|-------------|-------------|-------------|----------------------|-------------|
| HCT-116               |             |             |             |             |             |             |             |             |                      |             |
| Schiff bases          |             |             |             |             | Complexes   |             |             |             |                      |             |
| $\mu\text{M}$         | 1           | 3           | 5           | 6           | Pd-1        | Pd-3        | Pd-5        | Pd-6        | Pd(OAc) <sub>2</sub> | CisPt       |
| 0                     | 24.47±0.23  | 24.47±0.23  | 24.47±0.23  | 24.47±0.23  | 24.47±0.23  | 24.47±0.23  | 24.47±0.23  | 24.47±0.23  | 24.47±0.23           | 24.47±0.23  |
| 0.1                   | 23.50±0.12  | 31.25±0.06* | 29.26±0.88* | 31.57±1.35* | 24.97±0.25  | 18.46±1.09* | 34.51±0.68* | 26.16±1.29  | 23.58±0.68           | 17.56±0.62* |
| 1                     | 25.57±0.18  | 24.22±1.29  | 29.39±0.76* | 22.50±0.51  | 23.24±1.15  | 21.48±0.67  | 28.66±0.62* | 30.73±0.82* | 20.86±0.63           | 19.70±1.32* |
| 10                    | 25.70±0.48  | 23.38±0.13  | 28.23±0.18* | 37.86±0.65* | 24.51±0.28  | 23.13±0.44  | 30.12±0.48* | 32.32±0.37* | 25.50±0.28*          | 22.58±0.44  |
| 50                    | 22.61±0.13  | 25.33±0.40  | 31.57±0.67* | 26.76±0.79  | 23.13±1.62  | 21.59±1.69  | 29.16±0.61* | 25.83±0.19  | 23.25±0.63           | 25.97±0.77  |
| 100                   | 25.62±0.53  | 27.48±1.52  | 27.12±0.51* | 26.99±1.54  | 27.76±0.47* | 23.68±0.37  | 33.28±0.25* | 33.85±0.46* | 18.19±0.11*          | 22.24±0.40  |
| 500                   | 25.73±0.80  | 17.05±0.16* | 26.11±1.90  | 30.48±0.96* | 23.25±0.71  | 19.49±0.65* | 31.02±0.18* | 25.46±0.84  | 20.60±1.54*          | 18.33±1.05* |
| MDA-MB-231            |             |             |             |             |             |             |             |             |                      |             |
| Schiff bases          |             |             |             |             | Complexes   |             |             |             |                      |             |
| $\mu\text{M}$         | 1           | 3           | 5           | 6           | Pd-1        | Pd-3        | Pd-5        | Pd-6        | Pd(OAc) <sub>2</sub> | CisPt       |
| 0                     | 24.18±0.13  | 24.18±0.13  | 24.18±0.13  | 24.18±0.13  | 24.18±0.13  | 24.18±0.13  | 24.18±0.13  | 24.18±0.13  | 24.18±0.13           | 24.18±0.13  |
| 0.1                   | 39.71±0.78* | 24.28±0.29  | 25.95±0.49  | 23.04±1.77  | 31.80±0.60* | 33.30±0.43* | 31.27±1.74* | 25.67±0.30  | 23.39±1.17           | 23.40±0.81  |
| 1                     | 23.86±0.83  | 24.43±0.41  | 26.86±0.63  | 20.84±0.49  | 30.17±1.78* | 29.28±0.74* | 26.94±1.79  | 20.34±1.16* | 24.20±0.66           | 25.13±0.88  |
| 10                    | 27.33±0.75  | 27.07±0.89  | 30.59±0.23* | 23.91±0.61  | 34.81±0.84* | 25.45±0.53  | 31.25±0.72* | 20.76±0.80* | 22.93±0.14           | 28.38±1.91  |
| 50                    | 26.69±0.64  | 26.16±0.51  | 29.00±1.05* | 21.78±0.72  | 31.61±0.11* | 25.26±1.09  | 32.55±1.16* | 18.88±0.94* | 32.01±0.96*          | 27.69±0.21  |
| 100                   | 25.43±0.47  | 27.44±0.66  | 26.72±0.08  | 18.98±0.34* | 34.49±0.37* | 22.25±0.02  | 27.13±0.91  | 26.26±1.34  | 26.98±0.64           | 27.69±0.35  |
| 500                   | 27.58±0.90  | 23.01±0.63  | 24.80±1.13  | 21.36±0.45  | 28.47±0.47* | 30.91±0.94* | 25.56±0.63  | 22.29±0.34  | 24.92±1.83           | 31.34±4.12* |
| MRC-5                 |             |             |             |             |             |             |             |             |                      |             |
| $\mu\text{M}$         |             |             |             |             | Pd-1        | Pd-3        | Pd-5        | Pd-6        | Pd(OAc) <sub>2</sub> | CisPt       |
| 0                     | -           | -           | -           | -           | 20.38±0.18  | 20.38±0.18  | 20.38±0.18  | 20.38±0.18  | -                    | 20.38±0.18  |
| 1                     | -           | -           | -           | -           | 30.49±0.43* | 27.57±1.84* | 27.36±1.05* | 25.53±0.30* | -                    | 22.38±0.23  |
| 10                    | -           | -           | -           | -           | 31.91±1.13* | 30.40±1.07* | 30.81±0.76* | 30.52±0.28* | -                    | 21.75±0.59  |
| 50                    | -           | -           | -           | -           | 24.10±0.53  | 27.92±2.08* | 22.94±0.46  | 23.50±1.33  | -                    | 22.08±0.20  |
| 100                   | -           | -           | -           | -           | 29.51±1.11* | 21.68±0.42  | 28.16±0.52* | 23.09±1.44  | -                    | 26.81±0.50* |

## NMR spectra of the compounds investigated

### 1 $^{13}\text{C}$ NMR (DMSO)

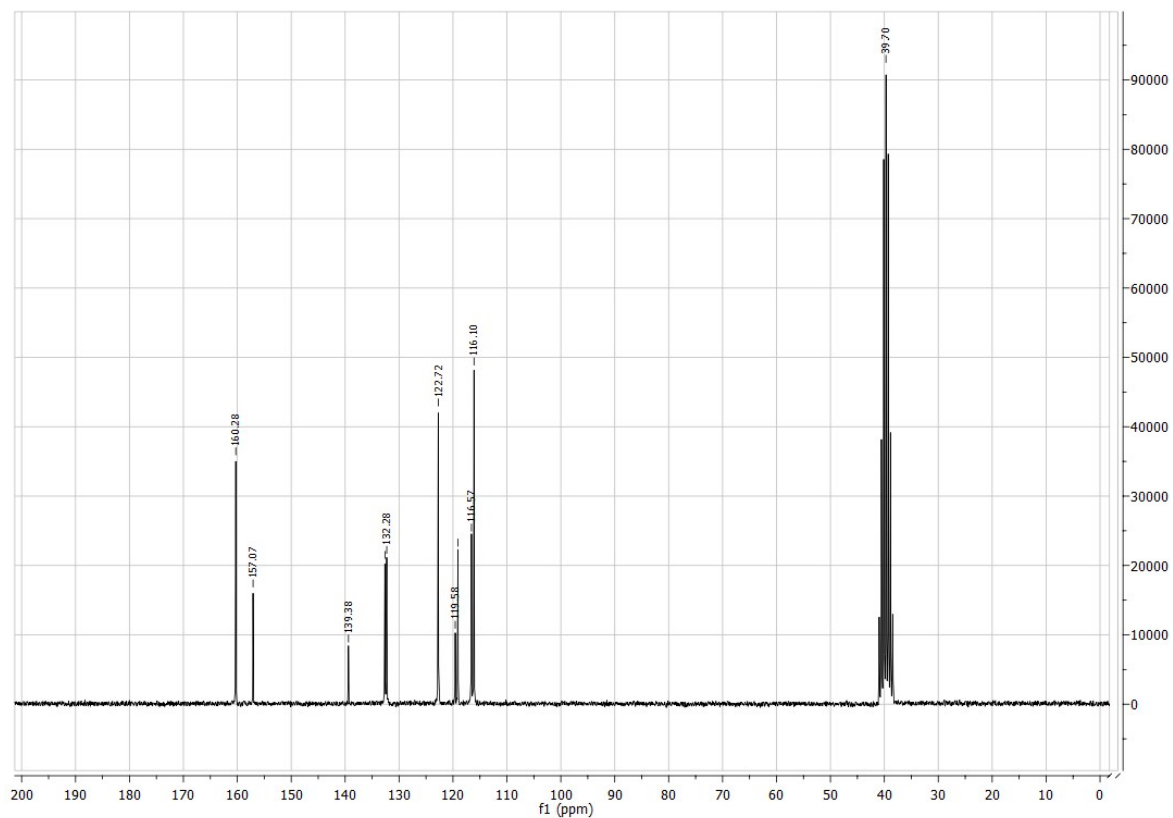

### 3 $^{13}\text{C}$ NMR ( $\text{CDCl}_3$ )

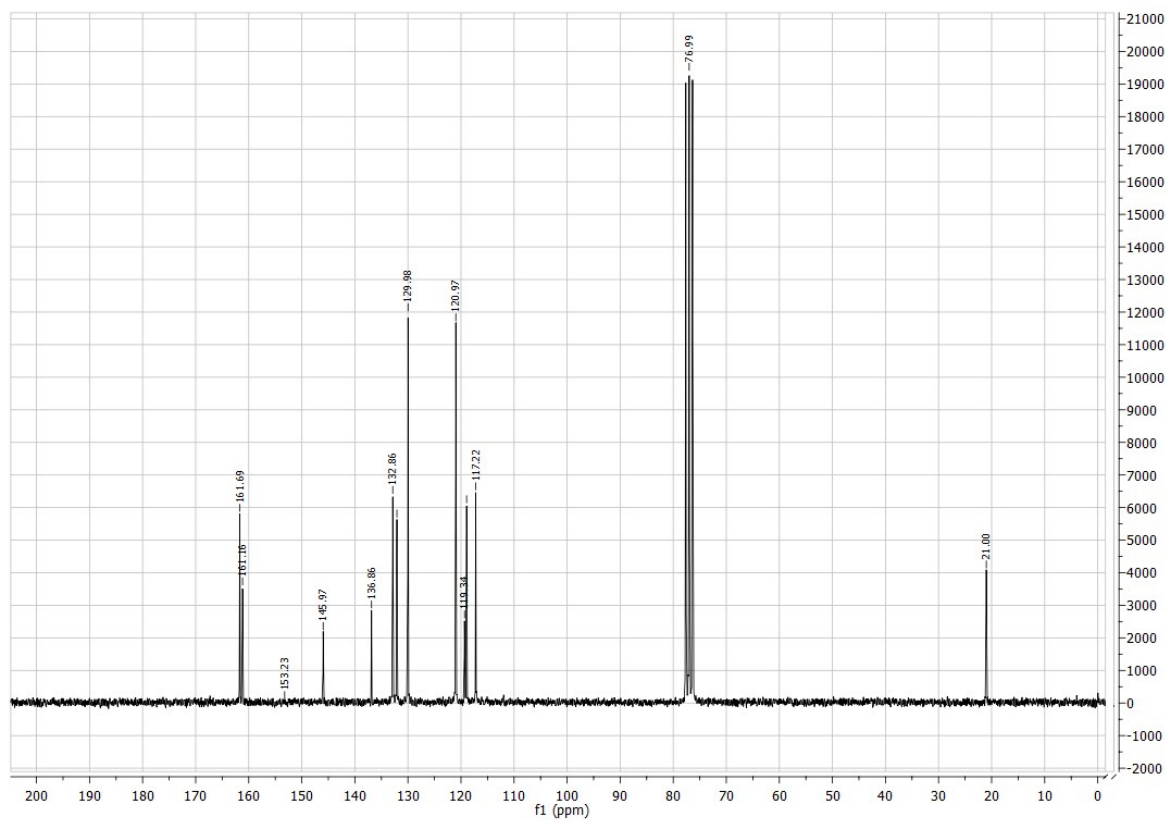

5  $^{13}\text{C}$  NMR ( $\text{CDCl}_3$ )

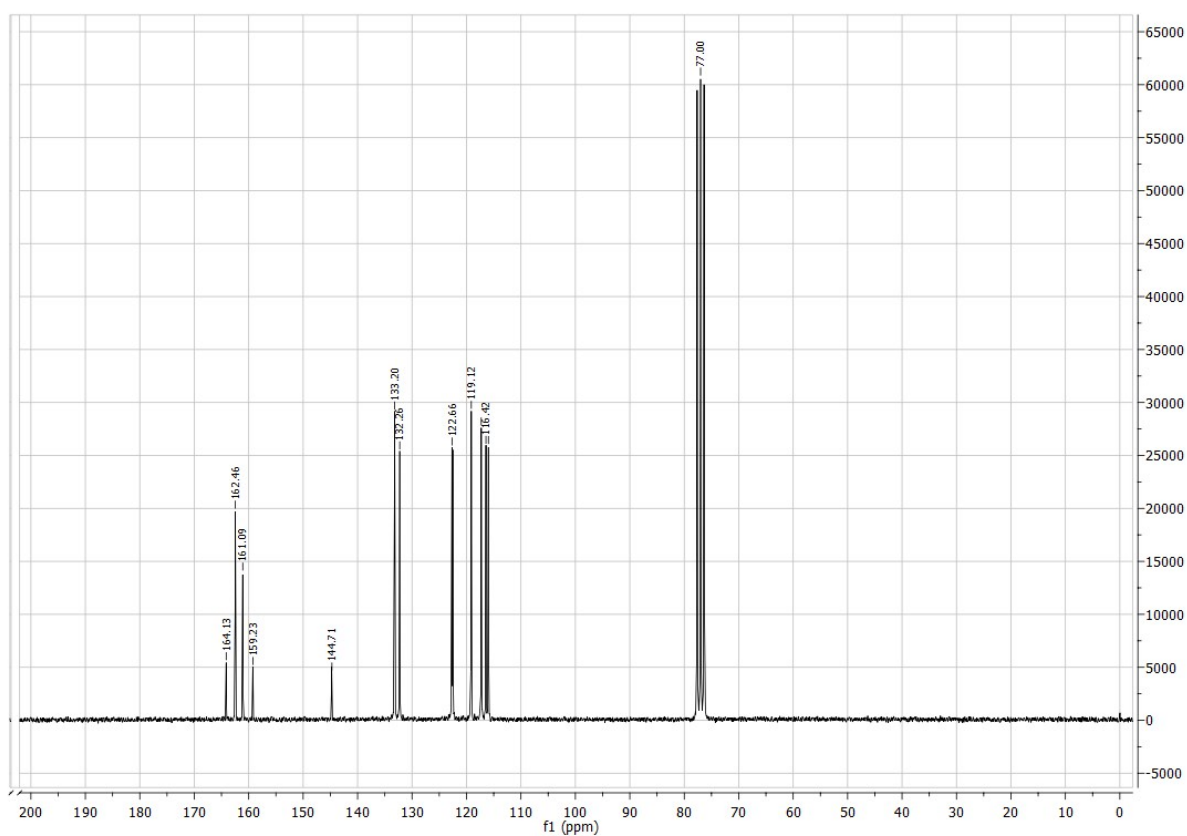

6  $^{13}\text{C}$  NMR (DMSO)

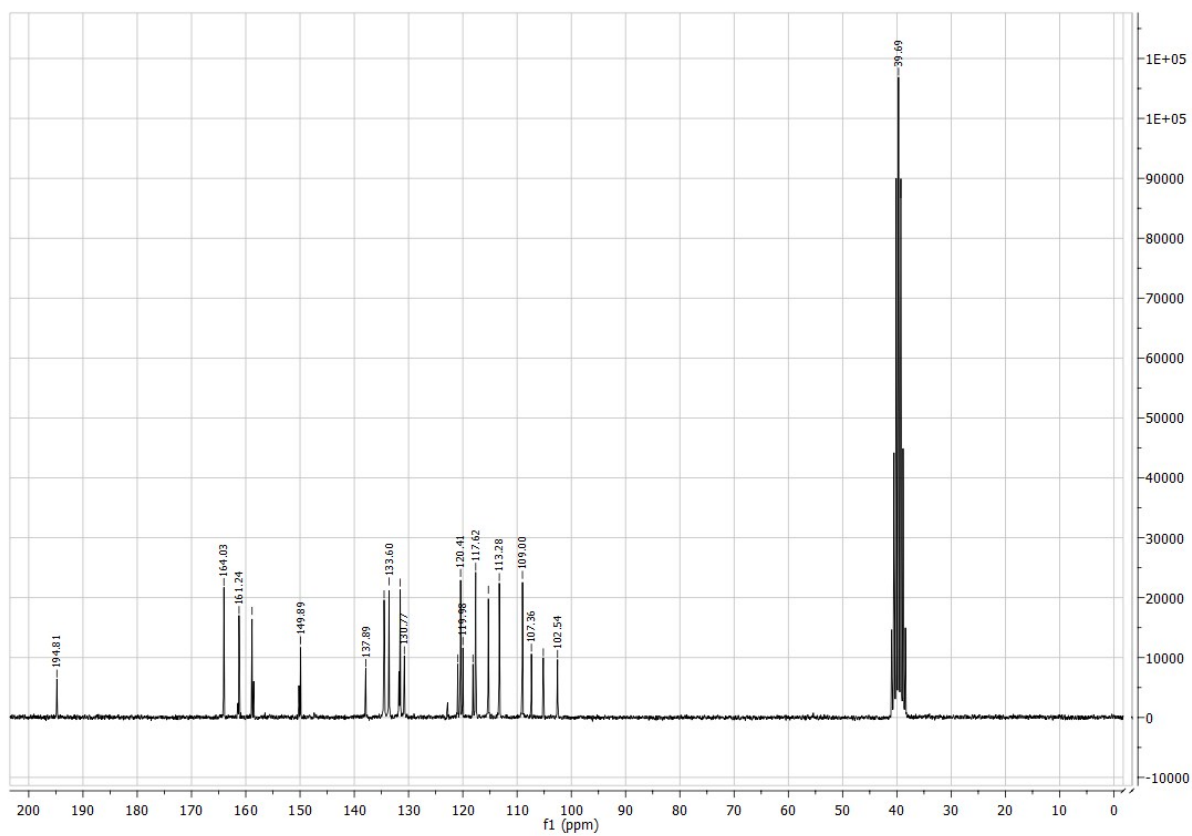

Pd-1  $^1\text{H}$  NMR (DMSO)

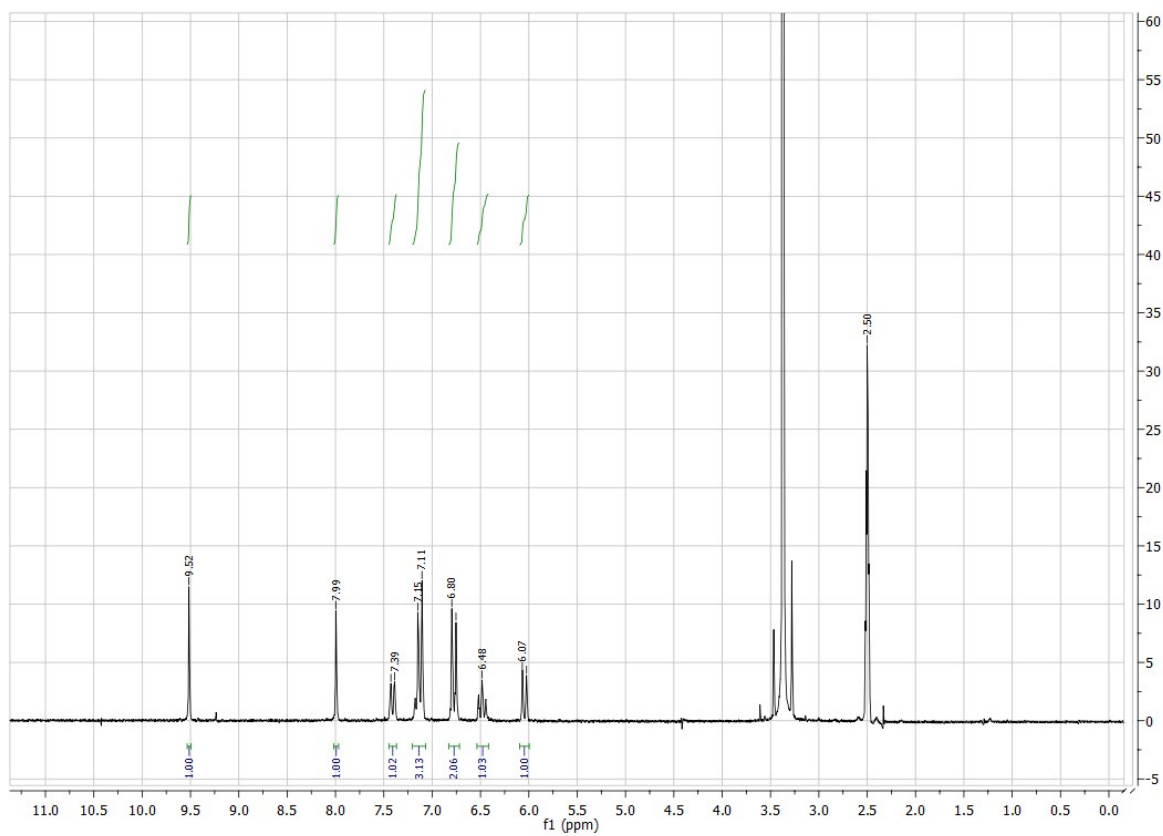

**Pd-1** <sup>13</sup>C NMR (DMSO)

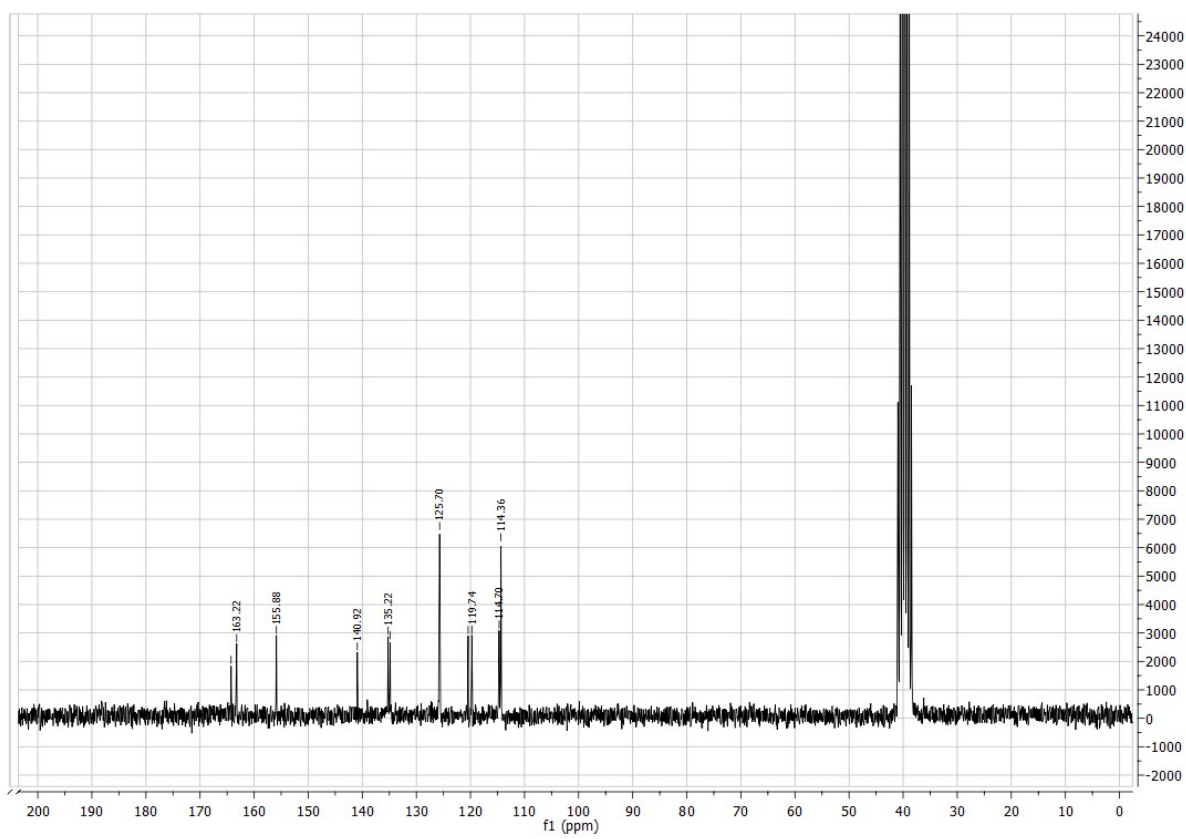

**Pd-3** <sup>1</sup>H NMR (CDCl<sub>3</sub>)



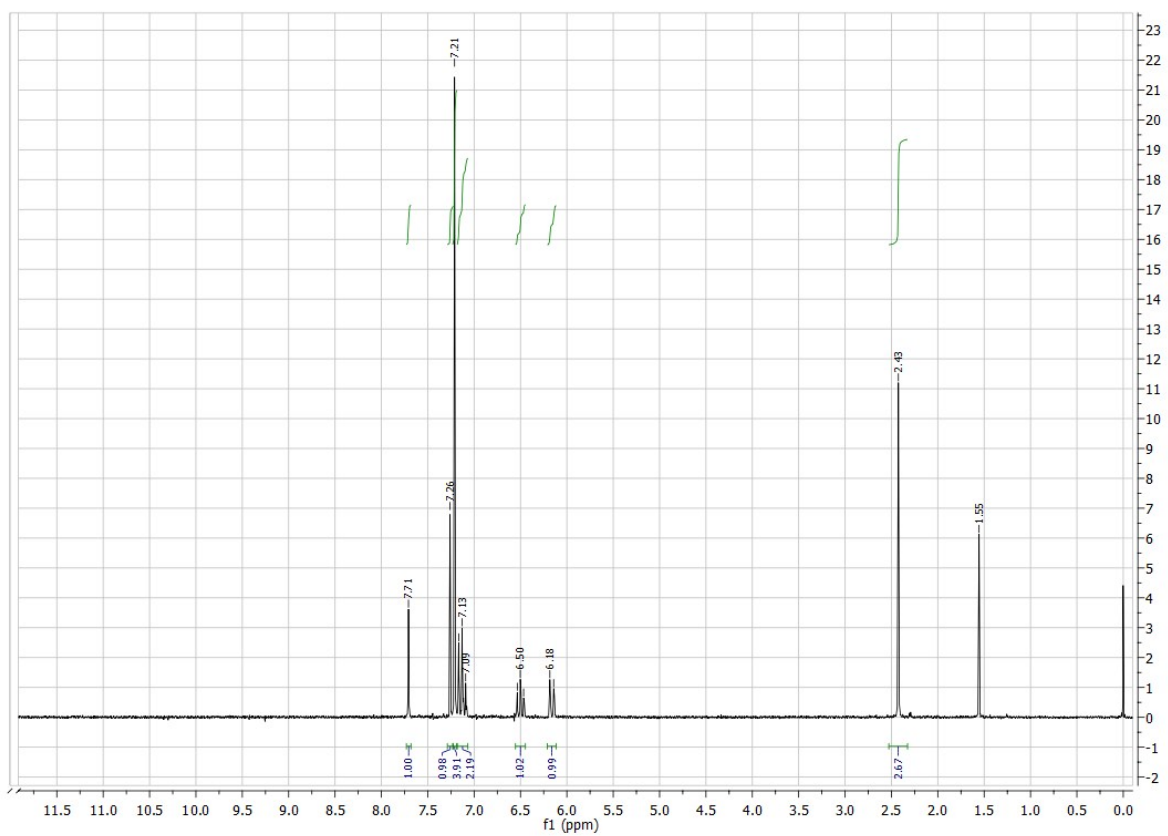

**Pd-3**  $^{13}\text{C}$  NMR ( $\text{CDCl}_3$ )

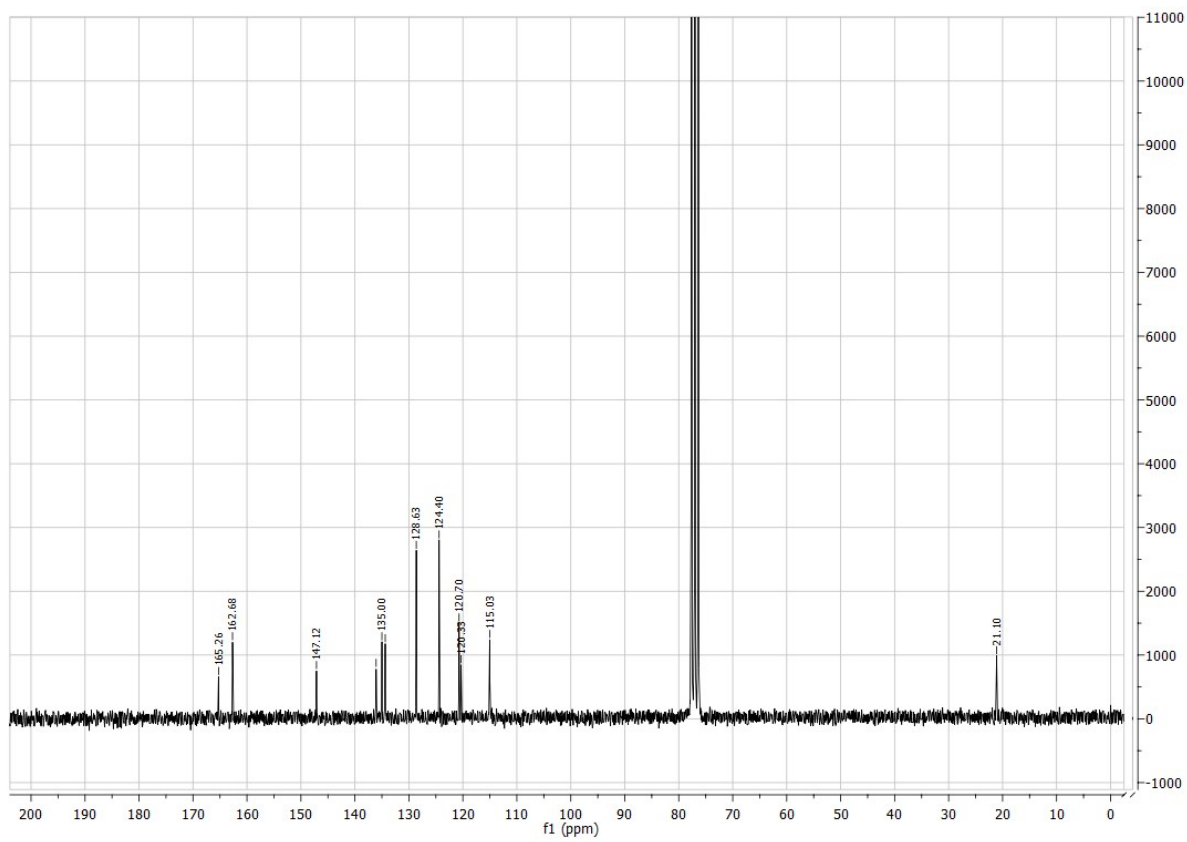

**Pd-5**  $^{13}\text{C}$  NMR ( $\text{CDCl}_3$ )

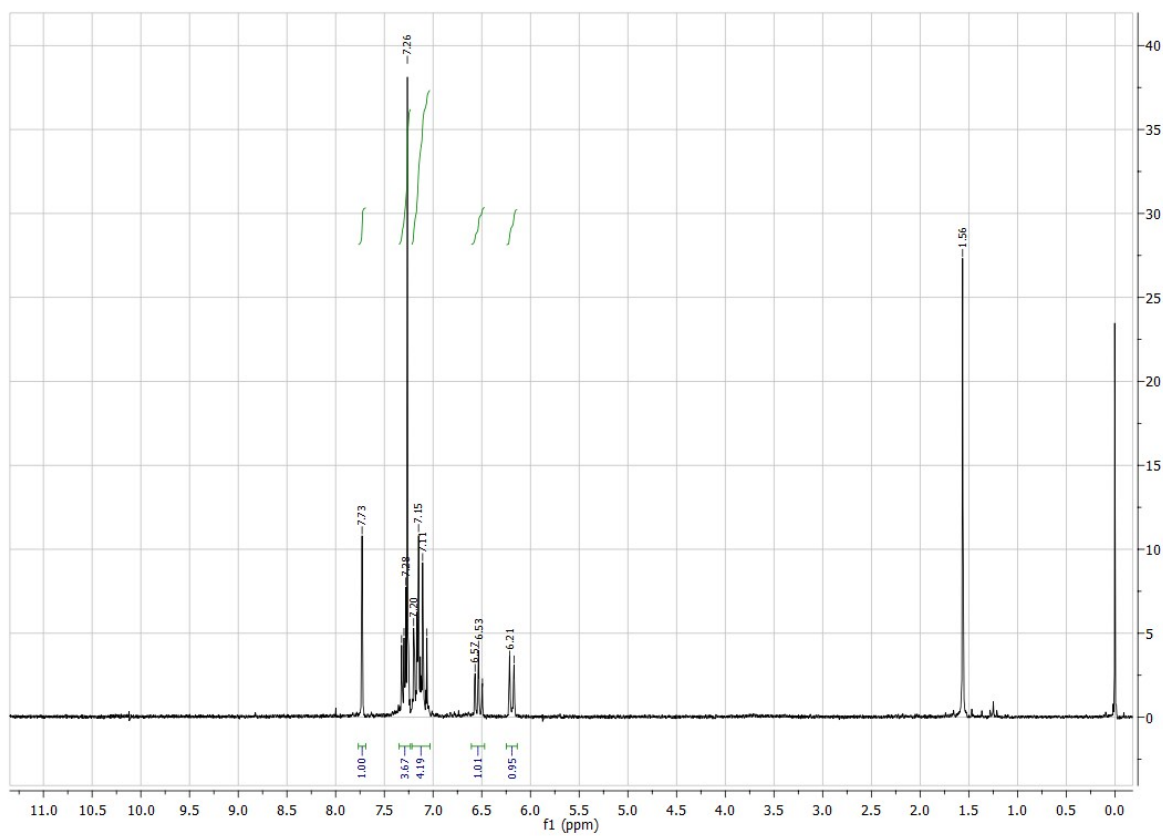

**Pd-5  $^{13}\text{C}$  NMR ( $\text{CDCl}_3$ )**

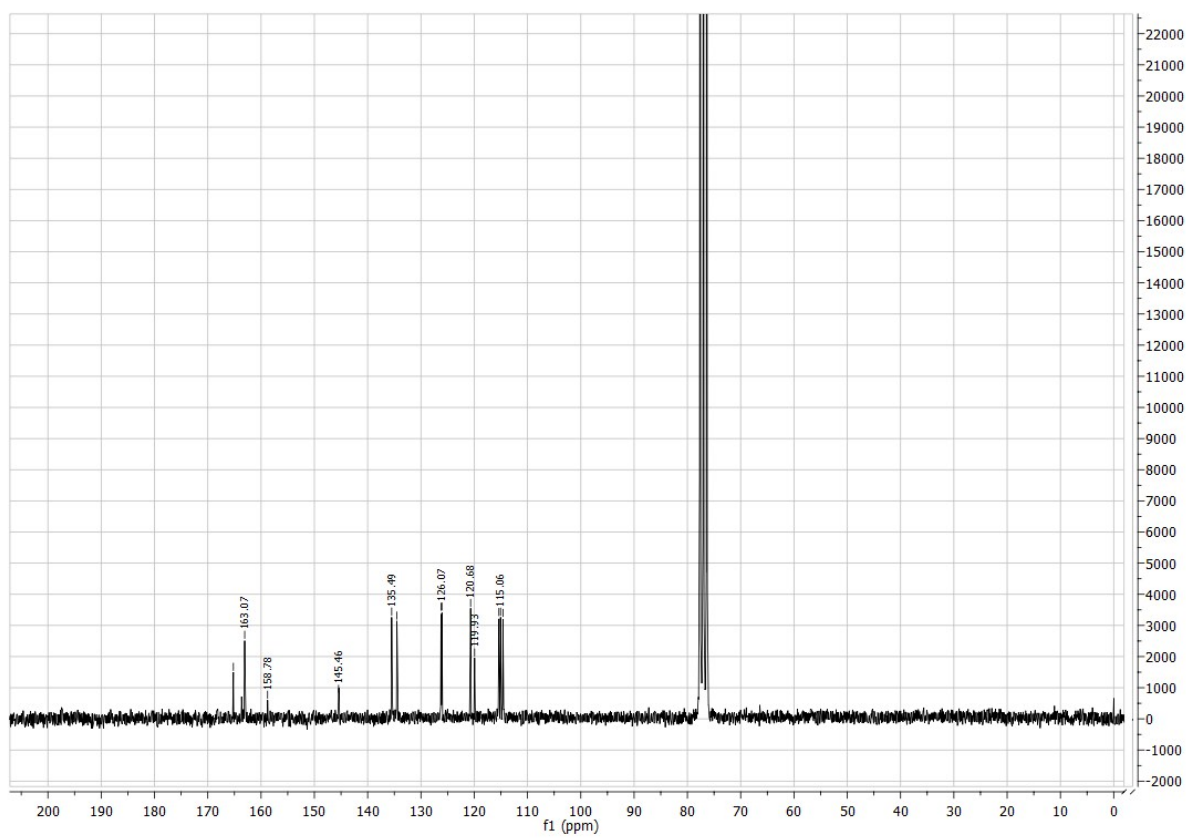

**Pd-6  $^{13}\text{C}$  NMR ( $\text{DMSO}$ )**

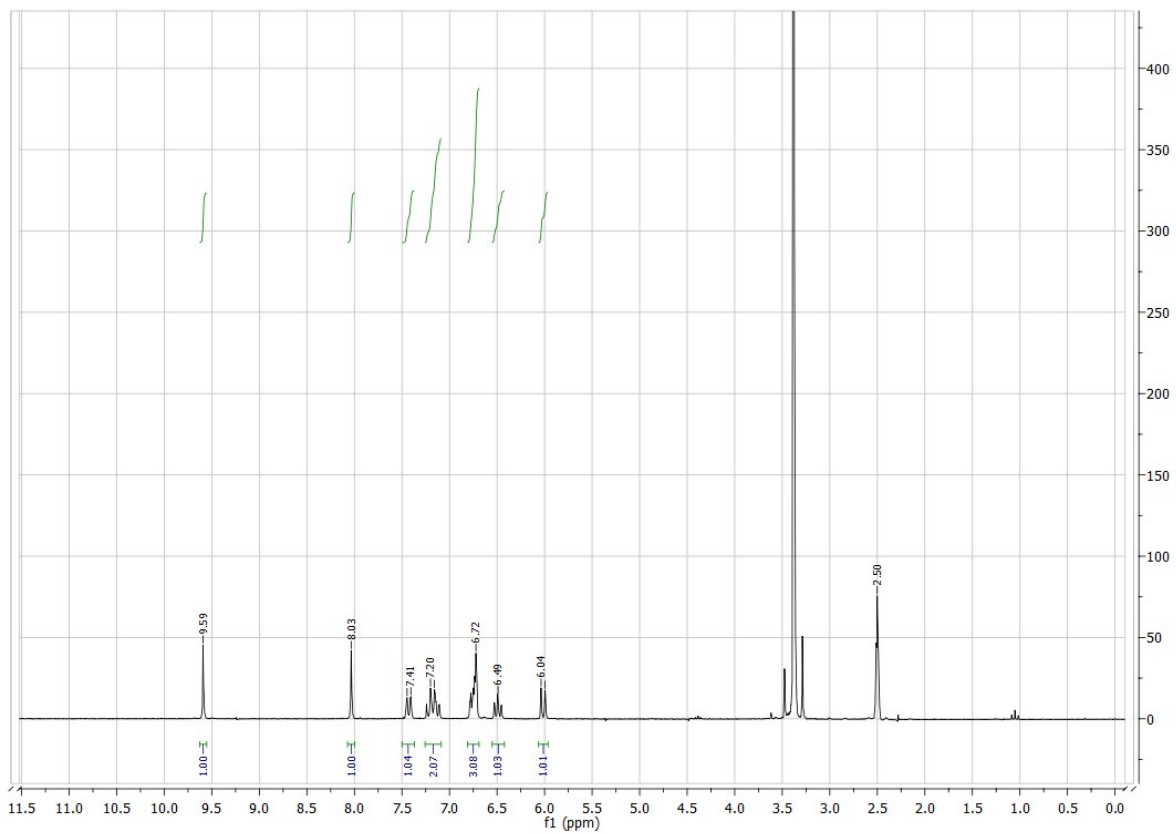

Pd-6  $^{13}\text{C}$  NMR (DMSO)

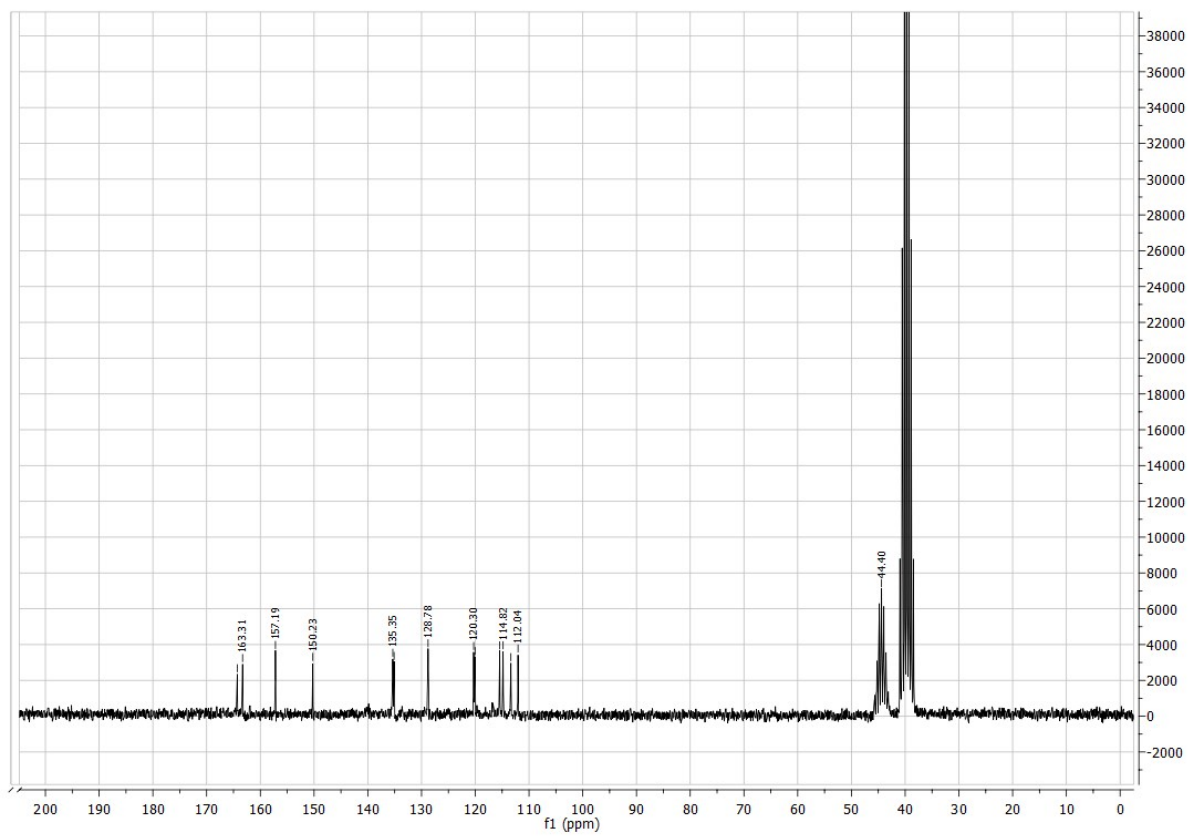

### Cartesian coordinates of the optimised structures

1

0 1

|   |             |             |             |
|---|-------------|-------------|-------------|
| N | 0.11125500  | 0.39571900  | 0.03429700  |
| C | -0.70906500 | -0.56953400 | -0.15990400 |
| H | -0.35028700 | -1.58427400 | -0.39474900 |
| C | -2.14375500 | -0.40368500 | -0.10668100 |
| C | -2.97443400 | -1.50474700 | -0.35325800 |
| C | -2.73481800 | 0.84599600  | 0.18723000  |
| C | -4.34795600 | -1.39397800 | -0.31304800 |
| H | -2.50739100 | -2.46117200 | -0.57901800 |
| C | -4.12542400 | 0.95077800  | 0.22813500  |
| C | -4.91635500 | -0.15373700 | -0.01963600 |
| H | -4.55702700 | 1.91998100  | 0.45620600  |
| C | 1.49544400  | 0.17457500  | 0.02703900  |
| C | 2.32259100  | 1.18375100  | -0.47194100 |
| C | 2.08652800  | -0.98221500 | 0.53284900  |
| C | 3.69332700  | 1.02608900  | -0.51265600 |
| H | 1.86181900  | 2.09371100  | -0.84457600 |
| C | 3.46363400  | -1.13992300 | 0.50820200  |
| H | 1.46846100  | -1.75302600 | 0.98424600  |
| C | 4.27100300  | -0.14146600 | -0.02335300 |
| H | 4.33939100  | 1.80081700  | -0.91234300 |
| H | 3.91566600  | -2.03952900 | 0.92137500  |
| H | -4.97699100 | -2.25593700 | -0.50608600 |
| H | -5.99698200 | -0.05142700 | 0.01555500  |
| O | 5.62328700  | -0.23905400 | -0.07349800 |
| H | 5.90530700  | -1.07974000 | 0.29666900  |
| O | -2.01165100 | 1.93826100  | 0.42754000  |
| H | -1.05816500 | 1.69547900  | 0.35243600  |

3

0 1

|   |             |             |             |
|---|-------------|-------------|-------------|
| N | 0.08930400  | 0.40421000  | 0.04184500  |
| C | -0.72637600 | -0.56341000 | -0.15932000 |
| H | -0.36137500 | -1.57461800 | -0.39933200 |
| C | -2.16167700 | -0.40341800 | -0.10839400 |
| C | -2.98735300 | -1.50640300 | -0.36315400 |
| C | -2.75782100 | 0.84284600  | 0.18994800  |
| C | -4.36124300 | -1.40067500 | -0.32698800 |
| H | -2.51596900 | -2.45986700 | -0.59226000 |
| C | -4.14903700 | 0.94251300  | 0.22628200  |
| C | -4.93487600 | -0.16373300 | -0.02931700 |
| H | -4.58495700 | 1.90902100  | 0.45754700  |
| C | 1.47390500  | 0.18314100  | 0.03335700  |
| C | 2.29832500  | 1.17567300  | -0.49750500 |
| C | 2.06270500  | -0.95933100 | 0.57443900  |
| C | 3.67001600  | 1.00425000  | -0.52848600 |
| H | 1.83873200  | 2.07635700  | -0.89391000 |
| C | 3.44035600  | -1.11389500 | 0.54924000  |
| H | 1.44083100  | -1.71153600 | 1.05205900  |
| C | 4.26806300  | -0.14455200 | -0.01012100 |
| H | 4.29752100  | 1.78345100  | -0.95542700 |
| H | 3.88567800  | -2.00350200 | 0.98914600  |
| H | -4.98674500 | -2.26376700 | -0.52624700 |
| H | -6.01598200 | -0.06544600 | 0.00276100  |
| O | -2.03956300 | 1.93625600  | 0.43828800  |
| H | -1.08473200 | 1.69806000  | 0.36411900  |
| C | 5.75351000  | -0.32451200 | -0.05993700 |
| H | 6.07499200  | -0.68855500 | -1.04304000 |
| H | 6.27728900  | 0.61930900  | 0.12082600  |
| H | 6.09511700  | -1.04939200 | 0.68427200  |

5

0 1

|   |            |            |            |
|---|------------|------------|------------|
| N | 0.12156300 | 0.40642700 | 0.04528400 |
|---|------------|------------|------------|

|   |             |             |             |
|---|-------------|-------------|-------------|
| C | -0.69650400 | -0.55919400 | -0.15855600 |
| H | -0.33286200 | -1.57026300 | -0.40157500 |
| C | -2.13072700 | -0.39874200 | -0.10814700 |
| C | -2.95587500 | -1.50107600 | -0.36978400 |
| C | -2.72734300 | 0.84597900  | 0.19589800  |
| C | -4.32938900 | -1.39556200 | -0.33460600 |
| H | -2.48416300 | -2.45323700 | -0.60338000 |
| C | -4.11856100 | 0.94517600  | 0.23126300  |
| C | -4.90345800 | -0.15992400 | -0.03125300 |
| H | -4.55510200 | 1.91025400  | 0.46703200  |
| C | 1.50478800  | 0.18019600  | 0.03460800  |
| C | 2.32867700  | 1.16651600  | -0.50983500 |
| C | 2.08740400  | -0.96430300 | 0.58203900  |
| C | 3.70118500  | 0.99717600  | -0.55337000 |
| H | 1.86940500  | 2.06373400  | -0.91292100 |
| C | 3.46238100  | -1.13739500 | 0.55441700  |
| H | 1.46161500  | -1.70974600 | 1.06381700  |
| C | 4.24535400  | -0.15689000 | -0.02168100 |
| H | 4.35487500  | 1.74725100  | -0.98507400 |
| H | 3.93453300  | -2.01352700 | 0.98597500  |
| H | -4.95465300 | -2.25749100 | -0.53920900 |
| H | -5.98458900 | -0.06208800 | -0.00011600 |
| O | -2.01015700 | 1.93855200  | 0.45078700  |
| H | -1.05556700 | 1.70321000  | 0.37684700  |
| F | 5.57435800  | -0.32036100 | -0.04896000 |

## 6

0 1

|   |             |             |             |
|---|-------------|-------------|-------------|
| N | -0.19885100 | -0.56587400 | 0.01886000  |
| C | 0.56269500  | 0.41831000  | -0.28678700 |
| H | 0.14506800  | 1.36162900  | -0.67364600 |
| C | 2.00125400  | 0.36438100  | -0.17162200 |
| C | 2.76311600  | 1.48078900  | -0.54205800 |
| C | 2.66447900  | -0.78898200 | 0.30560400  |
| C | 4.13773800  | 1.47755900  | -0.44685300 |
| H | 2.24085700  | 2.36106200  | -0.91091200 |
| C | 4.05652100  | -0.78578000 | 0.39877500  |
| C | 4.77811000  | 0.33163800  | 0.02818500  |
| H | 4.54429000  | -1.68226100 | 0.76764300  |
| C | -1.59260700 | -0.44284700 | -0.06139300 |
| C | -2.32669500 | -1.53867500 | -0.51008300 |
| C | -2.25676700 | 0.72141200  | 0.33002200  |
| C | -3.70694100 | -1.44620200 | -0.60171000 |
| H | -1.79898300 | -2.44272800 | -0.79505000 |
| C | -3.64135000 | 0.79238600  | 0.24544800  |
| H | -1.69307200 | 1.55769300  | 0.73956000  |
| C | -4.37353000 | -0.29062100 | -0.22777700 |
| H | -4.27777600 | -2.29555100 | -0.96421800 |
| H | 4.71363300  | 2.34941300  | -0.73678600 |
| H | 5.86105000  | 0.31405300  | 0.10790300  |
| O | 2.00976300  | -1.88884300 | 0.67150300  |
| H | 1.04517600  | -1.73169400 | 0.53822900  |
| H | -5.45413900 | -0.21112800 | -0.27757700 |
| O | -4.33471500 | 1.89535100  | 0.62418600  |
| H | -3.73066000 | 2.56835200  | 0.94881000  |

## Pd-1

0 1

|   |             |             |             |
|---|-------------|-------------|-------------|
| N | -1.09810100 | -1.74370300 | 0.06270300  |
| C | -0.56008900 | -2.91359400 | -0.06425000 |
| H | -1.25277400 | -3.76227400 | -0.10100700 |
| C | 0.81924000  | -3.26103000 | -0.13782900 |
| C | 1.12517500  | -4.63697400 | -0.25061800 |
| C | 1.88161600  | -2.31102900 | -0.07347600 |
| C | 2.41478400  | -5.09356400 | -0.30153300 |
| H | 0.29758900  | -5.34206100 | -0.29416400 |
| C | 3.20768000  | -2.81483700 | -0.12507900 |

|    |             |             |             |
|----|-------------|-------------|-------------|
| C  | 3.46094600  | -4.15668100 | -0.23655600 |
| H  | 4.00898900  | -2.08292900 | -0.07795800 |
| C  | -2.51772900 | -1.65872000 | 0.09036900  |
| C  | -3.16244700 | -1.17200600 | 1.22397100  |
| C  | -3.26568100 | -2.01977400 | -1.01986100 |
| C  | -4.53868300 | -1.07694600 | 1.25870600  |
| H  | -2.56534600 | -0.86101300 | 2.07546900  |
| C  | -4.64985800 | -1.91702600 | -0.99509900 |
| H  | -2.75873500 | -2.36424600 | -1.91690300 |
| C  | -5.28785700 | -1.44566500 | 0.14444100  |
| H  | -5.05637200 | -0.70758100 | 2.13792700  |
| H  | -5.23326900 | -2.19702200 | -1.86973800 |
| H  | 2.62662900  | -6.15341600 | -0.38782600 |
| H  | 4.49136600  | -4.50028700 | -0.27503500 |
| O  | -6.63694300 | -1.31807800 | 0.23045700  |
| H  | -7.04342500 | -1.59131200 | -0.59626100 |
| O  | 1.73966300  | -1.03657200 | 0.02922500  |
| N  | 1.09810400  | 1.74369500  | 0.06287600  |
| C  | 0.56008500  | 2.91359400  | -0.06396900 |
| H  | 1.25276600  | 3.76228000  | -0.10065100 |
| C  | -0.81924600 | 3.26103200  | -0.13750800 |
| C  | -1.12518700 | 4.63698700  | -0.25014200 |
| C  | -1.88162200 | 2.31101700  | -0.07325500 |
| C  | -2.41479800 | 5.09357800  | -0.30100100 |
| H  | -0.29760300 | 5.34208200  | -0.29361200 |
| C  | -3.20768700 | 2.81482700  | -0.12480300 |
| C  | -3.46095700 | 4.15668400  | -0.23612700 |
| H  | -4.00899300 | 2.08291200  | -0.07776800 |
| C  | 2.51773100  | 1.65871600  | 0.09053100  |
| C  | 3.16245500  | 1.17192300  | 1.22409600  |
| C  | 3.26568300  | 2.01986800  | -1.01966700 |
| C  | 4.53869100  | 1.07686500  | 1.25882200  |
| H  | 2.56535800  | 0.86086700  | 2.07557400  |
| C  | 4.64986100  | 1.91712500  | -0.99491500 |
| H  | 2.75873800  | 2.36441100  | -1.91668400 |
| C  | 5.28786200  | 1.44567300  | 0.14458600  |
| H  | 5.05638100  | 0.70743500  | 2.13801600  |
| H  | 5.23326900  | 2.19719500  | -1.86953100 |
| H  | -2.62665100 | 6.15343800  | -0.38717100 |
| H  | -4.49137600 | 4.50029400  | -0.27456900 |
| O  | 6.63695000  | 1.31808600  | 0.23059000  |
| H  | 7.04342900  | 1.59140800  | -0.59610000 |
| O  | -1.73966000 | 1.03655400  | 0.02931300  |
| Pd | 0.00000300  | -0.00000700 | 0.07376700  |

### Pd-3

|     |             |             |             |
|-----|-------------|-------------|-------------|
| 0 1 |             |             |             |
| N   | -1.11039300 | -1.73516700 | 0.05864600  |
| C   | -0.58272000 | -2.90812300 | -0.08082500 |
| H   | -1.28208900 | -3.75112400 | -0.12144600 |
| C   | 0.79385200  | -3.26441100 | -0.16494200 |
| C   | 1.09056000  | -4.64037400 | -0.29882600 |
| C   | 1.86266300  | -2.32222500 | -0.09238100 |
| C   | 2.37708500  | -5.10400500 | -0.36448500 |
| H   | 0.25836800  | -5.33961300 | -0.34823700 |
| C   | 3.18536600  | -2.83307800 | -0.15974600 |
| C   | 3.42954900  | -4.17460100 | -0.29264700 |
| H   | 3.98997200  | -2.10487800 | -0.10871400 |
| C   | -2.52938400 | -1.63976700 | 0.10114700  |
| C   | -3.15678800 | -1.16036200 | 1.24503100  |
| C   | -3.28901200 | -1.98390000 | -1.00768100 |
| C   | -4.53502800 | -1.05748800 | 1.28169200  |
| H   | -2.54912400 | -0.85787000 | 2.09234700  |
| C   | -4.67136100 | -1.86674100 | -0.96299600 |
| H   | -2.78989800 | -2.31892100 | -1.91295800 |
| C   | -5.31722300 | -1.40731400 | 0.18012400  |
| H   | -5.01988800 | -0.68612700 | 2.18183800  |

|    |             |             |             |
|----|-------------|-------------|-------------|
| H  | -5.25937900 | -2.13052300 | -1.83899600 |
| H  | 2.58167200  | -6.16372700 | -0.46823200 |
| H  | 4.45739300  | -4.52433000 | -0.34418200 |
| O  | 1.73050000  | -1.04889500 | 0.03156900  |
| N  | 1.11038500  | 1.73509600  | 0.05878500  |
| C  | 0.58269900  | 2.90805800  | -0.08062400 |
| H  | 1.28206300  | 3.75106900  | -0.12112900 |
| C  | -0.79386800 | 3.26435300  | -0.16478100 |
| C  | -1.09058700 | 4.64036100  | -0.29818900 |
| C  | -1.86267300 | 2.32212000  | -0.09275800 |
| C  | -2.37711300 | 5.10399000  | -0.36383300 |
| H  | -0.25840400 | 5.33963800  | -0.34721800 |
| C  | -3.18537900 | 2.83296700  | -0.16011300 |
| C  | -3.42957200 | 4.17453700  | -0.29250700 |
| H  | -3.98997400 | 2.10472600  | -0.10948800 |
| C  | 2.52938200  | 1.63974100  | 0.10128100  |
| C  | 3.15682300  | 1.16042700  | 1.24517600  |
| C  | 3.28898200  | 1.98387600  | -1.00757300 |
| C  | 4.53507700  | 1.05765900  | 1.28183300  |
| H  | 2.54919100  | 0.85792600  | 2.09250900  |
| C  | 4.67133500  | 1.86682200  | -0.96289300 |
| H  | 2.78983300  | 2.31883400  | -1.91285500 |
| C  | 5.31724000  | 1.40750100  | 0.18025400  |
| H  | 5.01996600  | 0.68637400  | 2.18199300  |
| H  | 5.25932800  | 2.13060800  | -1.83890800 |
| H  | -2.58170700 | 6.16374900  | -0.46718500 |
| H  | -4.45741500 | 4.52426900  | -0.34403700 |
| O  | -1.73050000 | 1.04874000  | 0.03062400  |
| Pd | 0.00000900  | -0.00004400 | 0.07350800  |
| C  | 6.81032700  | 1.30719200  | 0.23915700  |
| H  | 7.13117300  | 0.43678200  | 0.81976100  |
| H  | 7.24680100  | 1.22774900  | -0.76057500 |
| H  | 7.24718600  | 2.19219200  | 0.71711400  |
| C  | -6.81029700 | -1.30681900 | 0.23904700  |
| H  | -7.13101400 | -0.43573000 | 0.81870900  |
| H  | -7.24685100 | -1.22844900 | -0.76073200 |
| H  | -7.24718800 | -2.19123600 | 0.71805000  |

#### Pd-5

0 1

|   |             |             |             |
|---|-------------|-------------|-------------|
| N | 1.09241400  | 1.74600300  | 0.05818700  |
| C | 0.55199000  | 2.91551700  | -0.06834600 |
| H | 1.24250600  | 3.76588900  | -0.10581400 |
| C | -0.82723800 | 3.25856100  | -0.14175400 |
| C | -1.13700800 | 4.63399500  | -0.25744000 |
| C | -1.88703000 | 2.30557800  | -0.07726500 |
| C | -2.42762400 | 5.08584600  | -0.31173500 |
| H | -0.31165900 | 5.34154900  | -0.30109500 |
| C | -3.21413700 | 2.80479400  | -0.13389900 |
| C | -3.47107100 | 4.14563600  | -0.24824400 |
| H | -4.01355500 | 2.07068600  | -0.08976800 |
| C | 2.51166900  | 1.66383800  | 0.08980600  |
| C | 3.14847100  | 1.18437800  | 1.22933800  |
| C | 3.25818800  | 2.02415500  | -1.02438400 |
| C | 4.52791500  | 1.09202800  | 1.26778600  |
| H | 2.54805800  | 0.87601800  | 2.07902100  |
| C | 4.64239800  | 1.92793600  | -0.99963400 |
| H | 2.74815400  | 2.36278300  | -1.92154200 |
| C | 5.25045000  | 1.46386100  | 0.14846400  |
| H | 5.05062500  | 0.72942700  | 2.14619200  |
| H | 5.24886700  | 2.19954000  | -1.85664100 |
| H | -2.64298600 | 6.14466900  | -0.40076500 |
| H | -4.50234000 | 4.48580900  | -0.29119600 |
| O | -1.74175600 | 1.03129800  | 0.03080500  |
| N | -1.09241600 | -1.74600400 | 0.05813600  |
| C | -0.55199100 | -2.91551500 | -0.06841700 |
| H | -1.24250600 | -3.76588700 | -0.10590900 |

|    |             |             |             |
|----|-------------|-------------|-------------|
| C  | 0.82723700  | -3.25855800 | -0.14182700 |
| C  | 1.13700300  | -4.63398800 | -0.25756600 |
| C  | 1.88703100  | -2.30558000 | -0.07729100 |
| C  | 2.42761800  | -5.08584200 | -0.31187500 |
| H  | 0.31165300  | -5.34153800 | -0.30125400 |
| C  | 3.21413600  | -2.80480000 | -0.13394100 |
| C  | 3.47106800  | -4.14563800 | -0.24834000 |
| H  | 4.01355700  | -2.07069700 | -0.08977500 |
| C  | -2.51167000 | -1.66383800 | 0.08975100  |
| C  | -3.14847500 | -1.18439600 | 1.22929000  |
| C  | -3.25818500 | -2.02413100 | -1.02444900 |
| C  | -4.52791900 | -1.09204300 | 1.26773400  |
| H  | -2.54806300 | -0.87605100 | 2.07898000  |
| C  | -4.64239500 | -1.92791000 | -0.99970200 |
| H  | -2.74814700 | -2.36274500 | -1.92161000 |
| C  | -5.25045000 | -1.46385500 | 0.14840200  |
| H  | -5.05063100 | -0.72945700 | 2.14614400  |
| H  | -5.24886100 | -2.19949700 | -1.85671700 |
| H  | 2.64297600  | -6.14466200 | -0.40094600 |
| H  | 4.50233500  | -4.48581100 | -0.29130200 |
| O  | 1.74176200  | -1.03130500 | 0.03083600  |
| Pd | 0.00000200  | -0.00000500 | 0.07076000  |
| F  | -6.58658600 | -1.36704100 | 0.18079500  |
| F  | 6.58658600  | 1.36705000  | 0.18086000  |

#### Pd-6

|     |             |             |             |
|-----|-------------|-------------|-------------|
| 0 1 |             |             |             |
| N   | -1.03292700 | -1.77648300 | 0.18333300  |
| C   | -0.46213000 | -2.93525800 | 0.12931200  |
| H   | -1.13025800 | -3.80422600 | 0.10860300  |
| C   | 0.92887500  | -3.23998700 | 0.10692600  |
| C   | 1.28408500  | -4.60850700 | 0.07162500  |
| C   | 1.95721400  | -2.25036800 | 0.13220000  |
| C   | 2.58945400  | -5.01973600 | 0.06255500  |
| H   | 0.48247800  | -5.34401200 | 0.05443000  |
| C   | 3.30100200  | -2.70778800 | 0.12322800  |
| C   | 3.60168200  | -4.04376100 | 0.08973700  |
| H   | 4.07284300  | -1.94346400 | 0.14406700  |
| C   | -2.45581800 | -1.72124300 | 0.18492600  |
| C   | -3.13639000 | -1.46437500 | 1.36511700  |
| C   | -3.13916800 | -1.87637800 | -1.01337400 |
| C   | -4.52058800 | -1.37647500 | 1.33514400  |
| H   | -2.57561900 | -1.31213500 | 2.28134900  |
| C   | -4.52502600 | -1.77745800 | -1.02834400 |
| H   | -2.57983300 | -2.04416100 | -1.93188600 |
| C   | -5.22070300 | -1.52773300 | 0.14894400  |
| H   | -5.06513200 | -1.17865700 | 2.25337600  |
| H   | 2.84036000  | -6.07415500 | 0.03681700  |
| H   | 4.64368700  | -4.35264400 | 0.08403700  |
| O   | 1.77246600  | -0.97803700 | 0.16140600  |
| N   | 1.03294400  | 1.77637300  | 0.18337900  |
| C   | 0.46212400  | 2.93513200  | 0.12919400  |
| H   | 1.13023700  | 3.80410800  | 0.10834200  |
| C   | -0.92888500 | 3.23984400  | 0.10684700  |
| C   | -1.28411000 | 4.60835600  | 0.07131700  |
| C   | -1.95721700 | 2.25022800  | 0.13245300  |
| C   | -2.58948400 | 5.01957300  | 0.06232400  |
| H   | -0.48251200 | 5.34386400  | 0.05387800  |
| C   | -3.30101000 | 2.70763500  | 0.12358300  |
| C   | -3.60170300 | 4.04359800  | 0.08984800  |
| H   | -4.07283400 | 1.94330200  | 0.14469500  |
| C   | 2.45582900  | 1.72115300  | 0.18487800  |
| C   | 3.13645900  | 1.46348400  | 1.36486500  |
| C   | 3.13914100  | 1.87712900  | -1.01333800 |
| C   | 4.52065400  | 1.37564400  | 1.33478100  |
| H   | 2.57572400  | 1.31058500  | 2.28100900  |
| C   | 4.52500200  | 1.77825800  | -1.02842800 |



|    |             |             |             |
|----|-------------|-------------|-------------|
| H  | 2.57977300  | 2.04550900  | -1.93172200 |
| C  | 5.22072700  | 1.52773700  | 0.14865900  |
| H  | 5.06523500  | 1.17720100  | 2.25285600  |
| H  | -2.84039900 | 6.07398400  | 0.03639400  |
| H  | -4.64371000 | 4.35247500  | 0.08422500  |
| O  | -1.77245900 | 0.97790200  | 0.16185200  |
| Pd | 0.00000800  | -0.00006300 | 0.18648000  |
| O  | -5.24970500 | -1.91676400 | -2.16688900 |
| H  | -4.66124200 | -2.03972000 | -2.91658600 |
| O  | 5.24963200  | 1.91836700  | -2.16690700 |
| H  | 4.66113300  | 2.04181500  | -2.91649500 |
| H  | -6.30241600 | -1.45383100 | 0.11117700  |
| H  | 6.30243900  | 1.45387900  | 0.11080300  |

*cis* Pd-1

|    |             |             |             |
|----|-------------|-------------|-------------|
| N  | -1.09810100 | -1.74370300 | 0.06270300  |
| C  | -0.56008900 | -2.91359400 | -0.06425000 |
| H  | -1.25277400 | -3.76227400 | -0.10100700 |
| C  | 0.81924000  | -3.26103000 | -0.13782900 |
| C  | 1.12517500  | -4.63697400 | -0.25061800 |
| C  | 1.88161600  | -2.31102900 | -0.07347600 |
| C  | 2.41478400  | -5.09356400 | -0.30153300 |
| H  | 0.29758900  | -5.34206100 | -0.29416400 |
| C  | 3.20768000  | -2.81483700 | -0.12507900 |
| C  | 3.46094600  | -4.15668100 | -0.23655600 |
| H  | 4.00898900  | -2.08292900 | -0.07795800 |
| C  | -2.51772900 | -1.65872000 | 0.09036900  |
| C  | -3.16244700 | -1.17200600 | 1.22397100  |
| C  | -3.26568100 | -2.01977400 | -1.01986100 |
| C  | -4.53868300 | -1.07694600 | 1.25870600  |
| H  | -2.56534600 | -0.86101300 | 2.07546900  |
| C  | -4.64985800 | -1.91702600 | -0.99509900 |
| H  | -2.75873500 | -2.36424600 | -1.91690300 |
| C  | -5.28785700 | -1.44566500 | 0.14444100  |
| H  | -5.05637200 | -0.70758100 | 2.13792700  |
| H  | -5.23326900 | -2.19702200 | -1.86973800 |
| H  | 2.62662900  | -6.15341600 | -0.38782600 |
| H  | 4.49136600  | -4.50028700 | -0.27503500 |
| O  | -6.63694300 | -1.31807800 | 0.23045700  |
| H  | -7.04342500 | -1.59131200 | -0.59626100 |
| O  | 1.73966300  | -1.03657200 | 0.02922500  |
| N  | 1.09810400  | 1.74369500  | 0.06287600  |
| C  | 0.56008500  | 2.91359400  | -0.06396900 |
| H  | 1.25276600  | 3.76228000  | -0.10065100 |
| C  | -0.81924600 | 3.26103200  | -0.13750800 |
| C  | -1.12518700 | 4.63698700  | -0.25014200 |
| C  | -1.88162200 | 2.31101700  | -0.07325500 |
| C  | -2.41479800 | 5.09357800  | -0.30100100 |
| H  | -0.29760300 | 5.34208200  | -0.29361200 |
| C  | -3.20768700 | 2.81482700  | -0.12480300 |
| C  | -3.46095700 | 4.15668400  | -0.23612700 |
| H  | -4.00899300 | 2.08291200  | -0.07776800 |
| C  | 2.51773100  | 1.65871600  | 0.09053100  |
| C  | 3.16245500  | 1.17192300  | 1.22409600  |
| C  | 3.26568300  | 2.01986800  | -1.01966700 |
| C  | 4.53869100  | 1.07686500  | 1.25882200  |
| H  | 2.56535800  | 0.86086700  | 2.07557400  |
| C  | 4.64986100  | 1.91712500  | -0.99491500 |
| H  | 2.75873800  | 2.36441100  | -1.91668400 |
| C  | 5.28786200  | 1.44567300  | 0.14458600  |
| H  | 5.05638100  | 0.70743500  | 2.13801600  |
| H  | 5.23326900  | 2.19719500  | -1.86953100 |
| H  | -2.62665100 | 6.15343800  | -0.38717100 |
| H  | -4.49137600 | 4.50029400  | -0.27456900 |
| O  | 6.63695000  | 1.31808600  | 0.23059000  |
| H  | 7.04342900  | 1.59140800  | -0.59610000 |
| O  | -1.73966000 | 1.03655400  | 0.02931300  |
| Pd | 0.00000300  | -0.00000700 | 0.07376700  |

*cis* Pd-3

|   |             |             |             |
|---|-------------|-------------|-------------|
| N | -1.11039300 | -1.73516700 | 0.05864600  |
| C | -0.58272000 | -2.90812300 | -0.08082500 |
| H | -1.28208900 | -3.75112400 | -0.12144600 |
| C | 0.79385200  | -3.26441100 | -0.16494200 |
| C | 1.09056000  | -4.64037400 | -0.29882600 |
| C | 1.86266300  | -2.32222500 | -0.09238100 |
| C | 2.37708500  | -5.10400500 | -0.36448500 |
| H | 0.25836800  | -5.33961300 | -0.34823700 |
| C | 3.18536600  | -2.83307800 | -0.15974600 |

|    |             |             |             |
|----|-------------|-------------|-------------|
| C  | 3.42954900  | -4.17460100 | -0.29264700 |
| H  | 3.98997200  | -2.10487800 | -0.10871400 |
| C  | -2.52938400 | -1.63976700 | 0.10114700  |
| C  | -3.15678800 | -1.16036200 | 1.24503100  |
| C  | -3.28901200 | -1.98390000 | -1.00768100 |
| C  | -4.53502800 | -1.05748800 | 1.28169200  |
| H  | -2.54912400 | -0.85787000 | 2.09234700  |
| C  | -4.67136100 | -1.86674100 | -0.96299600 |
| H  | -2.78989800 | -2.31892100 | -1.91295800 |
| C  | -5.31722300 | -1.40731400 | 0.18012400  |
| H  | -5.01988800 | -0.68612700 | 2.18183800  |
| H  | -5.25937900 | -2.13052300 | -1.83899600 |
| H  | 2.58167200  | -6.16372700 | -0.46823200 |
| H  | 4.45739300  | -4.52433000 | -0.34418200 |
| O  | 1.73050000  | -1.04889500 | 0.03156900  |
| N  | 1.11038500  | 1.73509600  | 0.05878500  |
| C  | 0.58269900  | 2.90805800  | -0.08062400 |
| H  | 1.28206300  | 3.75106900  | -0.12112900 |
| C  | -0.79386800 | 3.26435300  | -0.16478100 |
| C  | -1.09058700 | 4.64036100  | -0.29818900 |
| C  | -1.86267300 | 2.32212000  | -0.09275800 |
| C  | -2.37711300 | 5.10399000  | -0.36383300 |
| H  | -0.25840400 | 5.33963800  | -0.34721800 |
| C  | -3.18537900 | 2.83296700  | -0.16011300 |
| C  | -3.42957200 | 4.17453700  | -0.29250700 |
| H  | -3.98997400 | 2.10472600  | -0.10948800 |
| C  | 2.52938200  | 1.63974100  | 0.10128100  |
| C  | 3.15682300  | 1.16042700  | 1.24517600  |
| C  | 3.28898200  | 1.98387600  | -1.00757300 |
| C  | 4.53507700  | 1.05765900  | 1.28183300  |
| H  | 2.54919100  | 0.85792600  | 2.09250900  |
| C  | 4.67133500  | 1.86682200  | -0.96289300 |
| H  | 2.78983300  | 2.31883400  | -1.91285500 |
| C  | 5.31724000  | 1.40750100  | 0.18025400  |
| H  | 5.01996600  | 0.68637400  | 2.18199300  |
| H  | 5.25932800  | 2.13060800  | -1.83890800 |
| H  | -2.58170700 | 6.16374900  | -0.46718500 |
| H  | -4.45741500 | 4.52426900  | -0.34403700 |
| O  | -1.73050000 | 1.04874000  | 0.03062400  |
| Pd | 0.00000900  | -0.00004400 | 0.07350800  |
| C  | 6.81032700  | 1.30719200  | 0.23915700  |
| H  | 7.13117300  | 0.43678200  | 0.81976100  |
| H  | 7.24680100  | 1.22774900  | -0.76057500 |
| H  | 7.24718600  | 2.19219200  | 0.71711400  |
| C  | -6.81029700 | -1.30681900 | 0.23904700  |
| H  | -7.13101400 | -0.43573000 | 0.81870900  |
| H  | -7.24685100 | -1.22844900 | -0.76073200 |
| H  | -7.24718800 | -2.19123600 | 0.71805000  |

*cis* Pd-5

|   |             |            |             |
|---|-------------|------------|-------------|
| N | 1.09241400  | 1.74600300 | 0.05818700  |
| C | 0.55199000  | 2.91551700 | -0.06834600 |
| H | 1.24250600  | 3.76588900 | -0.10581400 |
| C | -0.82723800 | 3.25856100 | -0.14175400 |
| C | -1.13700800 | 4.63399500 | -0.25744000 |
| C | -1.88703000 | 2.30557800 | -0.07726500 |
| C | -2.42762400 | 5.08584600 | -0.31173500 |
| H | -0.31165900 | 5.34154900 | -0.30109500 |
| C | -3.21413700 | 2.80479400 | -0.13389900 |
| C | -3.47107100 | 4.14563600 | -0.24824400 |
| H | -4.01355500 | 2.07068600 | -0.08976800 |
| C | 2.51166900  | 1.66383800 | 0.08980600  |
| C | 3.14847100  | 1.18437800 | 1.22933800  |
| C | 3.25818800  | 2.02415500 | -1.02438400 |
| C | 4.52791500  | 1.09202800 | 1.26778600  |

|    |             |             |             |
|----|-------------|-------------|-------------|
| H  | 2.54805800  | 0.87601800  | 2.07902100  |
| C  | 4.64239800  | 1.92793600  | -0.99963400 |
| H  | 2.74815400  | 2.36278300  | -1.92154200 |
| C  | 5.25045000  | 1.46386100  | 0.14846400  |
| H  | 5.05062500  | 0.72942700  | 2.14619200  |
| H  | 5.24886700  | 2.19954000  | -1.85664100 |
| H  | -2.64298600 | 6.14466900  | -0.40076500 |
| H  | -4.50234000 | 4.48580900  | -0.29119600 |
| O  | -1.74175600 | 1.03129800  | 0.03080500  |
| N  | -1.09241600 | -1.74600400 | 0.05813600  |
| C  | -0.55199100 | -2.91551500 | -0.06841700 |
| H  | -1.24250600 | -3.76588700 | -0.10590900 |
| C  | 0.82723700  | -3.25855800 | -0.14182700 |
| C  | 1.13700300  | -4.63398800 | -0.25756600 |
| C  | 1.88703100  | -2.30558000 | -0.07729100 |
| C  | 2.42761800  | -5.08584200 | -0.31187500 |
| H  | 0.31165300  | -5.34153800 | -0.30125400 |
| C  | 3.21413600  | -2.80480000 | -0.13394100 |
| C  | 3.47106800  | -4.14563800 | -0.24834000 |
| H  | 4.01355700  | -2.07069700 | -0.08977500 |
| C  | -2.51167000 | -1.66383800 | 0.08975100  |
| C  | -3.14847500 | -1.18439600 | 1.22929000  |
| C  | -3.25818500 | -2.02413100 | -1.02444900 |
| C  | -4.52791900 | -1.09204300 | 1.26773400  |
| H  | -2.54806300 | -0.87605100 | 2.07898000  |
| C  | -4.64239500 | -1.92791000 | -0.99970200 |
| H  | -2.74814700 | -2.36274500 | -1.92161000 |
| C  | -5.25045000 | -1.46385500 | 0.14840200  |
| H  | -5.05063100 | -0.72945700 | 2.14614400  |
| H  | -5.24886100 | -2.19949700 | -1.85671700 |
| H  | 2.64297600  | -6.14466200 | -0.40094600 |
| H  | 4.50233500  | -4.48581100 | -0.29130200 |
| O  | 1.74176200  | -1.03130500 | 0.03083600  |
| Pd | 0.00000200  | -0.00000500 | 0.07076000  |
| F  | -6.58658600 | -1.36704100 | 0.18079500  |
| F  | 6.58658600  | 1.36705000  | 0.18086000  |

*cis* Pd-6

|   |             |             |             |
|---|-------------|-------------|-------------|
| N | -1.03292700 | -1.77648300 | 0.18333300  |
| C | -0.46213000 | -2.93525800 | 0.12931200  |
| H | -1.13025800 | -3.80422600 | 0.10860300  |
| C | 0.92887500  | -3.23998700 | 0.10692600  |
| C | 1.28408500  | -4.60850700 | 0.07162500  |
| C | 1.95721400  | -2.25036800 | 0.13220000  |
| C | 2.58945400  | -5.01973600 | 0.06255500  |
| H | 0.48247800  | -5.34401200 | 0.05443000  |
| C | 3.30100200  | -2.70778800 | 0.12322800  |
| C | 3.60168200  | -4.04376100 | 0.08973700  |
| H | 4.07284300  | -1.94346400 | 0.14406700  |
| C | -2.45581800 | -1.72124300 | 0.18492600  |
| C | -3.13639000 | -1.46437500 | 1.36511700  |
| C | -3.13916800 | -1.87637800 | -1.01337400 |
| C | -4.52058800 | -1.37647500 | 1.33514400  |
| H | -2.57561900 | -1.31213500 | 2.28134900  |
| C | -4.52502600 | -1.77745800 | -1.02834400 |
| H | -2.57983300 | -2.04416100 | -1.93188600 |
| C | -5.22070300 | -1.52773300 | 0.14894400  |
| H | -5.06513200 | -1.17865700 | 2.25337600  |
| H | 2.84036000  | -6.07415500 | 0.03681700  |
| H | 4.64368700  | -4.35264400 | 0.08403700  |
| O | 1.77246600  | -0.97803700 | 0.16140600  |
| N | 1.03294400  | 1.77637300  | 0.18337900  |
| C | 0.46212400  | 2.93513200  | 0.12919400  |
| H | 1.13023700  | 3.80410800  | 0.10834200  |
| C | -0.92888500 | 3.23984400  | 0.10684700  |

|    |             |             |             |
|----|-------------|-------------|-------------|
| C  | -1.28411000 | 4.60835600  | 0.07131700  |
| C  | -1.95721700 | 2.25022800  | 0.13245300  |
| C  | -2.58948400 | 5.01957300  | 0.06232400  |
| H  | -0.48251200 | 5.34386400  | 0.05387800  |
| C  | -3.30101000 | 2.70763500  | 0.12358300  |
| C  | -3.60170300 | 4.04359800  | 0.08984800  |
| H  | -4.07283400 | 1.94330200  | 0.14469500  |
| C  | 2.45582900  | 1.72115300  | 0.18487800  |
| C  | 3.13645900  | 1.46348400  | 1.36486500  |
| C  | 3.13914100  | 1.87712900  | -1.01333800 |
| C  | 4.52065400  | 1.37564400  | 1.33478100  |
| H  | 2.57572400  | 1.31058500  | 2.28100900  |
| C  | 4.52500200  | 1.77825800  | -1.02842800 |
| H  | 2.57977300  | 2.04550900  | -1.93172200 |
| C  | 5.22072700  | 1.52773700  | 0.14865900  |
| H  | 5.06523500  | 1.17720100  | 2.25285600  |
| H  | -2.84039900 | 6.07398400  | 0.03639400  |
| H  | -4.64371000 | 4.35247500  | 0.08422500  |
| O  | -1.77245900 | 0.97790200  | 0.16185200  |
| Pd | 0.00000800  | -0.00006300 | 0.18648000  |
| O  | -5.24970500 | -1.91676400 | -2.16688900 |
| H  | -4.66124200 | -2.03972000 | -2.91658600 |
| O  | 5.24963200  | 1.91836700  | -2.16690700 |
| H  | 4.66113300  | 2.04181500  | -2.91649500 |
| H  | -6.30241600 | -1.45383100 | 0.11117700  |
| H  | 6.30243900  | 1.45387900  | 0.11080300  |
